1 Nonsense mediated decay and a novel protein Period-2 regulate *casein kinase I* in an opposing  
2 manner to control circadian period in *Neurospora crassa*

3  
4 Christina M. Kelliher<sup>1</sup>, Randy Lambregts<sup>1</sup>, Qijun Xiang<sup>1</sup>, Christopher L. Baker<sup>1,3</sup>, Jennifer J.  
5 Loros<sup>2</sup>, and Jay C. Dunlap<sup>1,\*</sup>

6  
7 <sup>1</sup> Department of Molecular & Systems Biology, Geisel School of Medicine at Dartmouth,  
8 Hanover, NH, USA

9 <sup>2</sup> Department of Biochemistry & Cell Biology, Geisel School of Medicine at Dartmouth, Hanover,  
10 NH, USA

11 <sup>3</sup> Genetics and Genomics, The Jackson Laboratory, Bar Harbor, ME, 04660, USA

12  
13 \* Corresponding author

14 Email: [jay.c.dunlap@dartmouth.edu](mailto:jay.c.dunlap@dartmouth.edu)

15  
16 Keywords: Circadian Clock, *Neurospora crassa*, Casein Kinase I, Period-2, Period-6, Nonsense  
17 Mediated Decay, RNA-binding protein, RNA stability

18  
19  
20  
21  
22  
23  
24  
25  
26  
27  
28  
29  
30  
31  
32  
33  
34

## 35 **Abstract**

36 Circadian clocks in fungi and animals are driven by a functionally conserved  
37 transcription-translation feedback loop. In *Neurospora crassa*, negative feedback is executed by  
38 a complex of Frequency (FRQ), FRQ-interacting RNA helicase (FRH), and Casein Kinase I  
39 (CKI), which inhibits the activity of the clock's positive arm, the White Collar Complex (WCC).  
40 Here, we show that the *period-2* gene, whose mutation is characterized by recessive inheritance  
41 of a long 26-hour period phenotype, encodes an RNA-binding protein that stabilizes the *ck-1a*  
42 transcript, resulting in CKI protein levels sufficient for normal rhythmicity. Moreover, by  
43 examining the molecular basis for the short circadian period of *period-6* mutants, we uncovered  
44 a strong influence of the Nonsense Mediated Decay pathway on CKI levels. The finding that  
45 circadian period defects in two classically-derived *Neurospora* clock mutants each arise from  
46 disruption of *ck-1a* regulation is consistent with circadian period being exquisitely sensitive to  
47 levels of *casein kinase I*.

48

## 49 **Introduction**

50 The *Neurospora* circadian oscillator is a transcription-translation feedback loop that is  
51 positively regulated by the White Collar Complex (WCC) transcription factors, which drive  
52 expression of the negative arm component Frequency (FRQ). The circadian negative arm  
53 complex is composed of FRQ, FRQ-Interacting RNA helicase (FRH), and Casein Kinase I (CKI),  
54 which promote WCC phosphorylation on key phospho-sites to inhibit its activity (Wang et al.,  
55 2019). Although not related by sequence similarity, FRQ is functionally homologous to PERs  
56 and CRYs in the animal clock. FRQ, PERs, and CRYs are extensively regulated  
57 transcriptionally, translationally, and post-translationally over the circadian day, and these  
58 regulatory mechanisms are highly conserved among clocks in animals and fungi (reviewed in:  
59 (Hurley et al., 2016)).

60 Negative arm components are regulated at the RNA and protein levels to maintain  
61 circadian phase and period. Anti-sense transcription at the *frq* locus produces the *qrf* transcript,  
62 which is required for proper phase control and light responses of the fungal clock (Kramer et al.,  
63 2003). The mammalian PER2 anti-sense transcript displays nearly identical dynamics to *qrf*  
64 expression (Koike et al., 2012). PER2 sense expression levels are further regulated by  
65 microRNA binding sites in its 3' UTR (Yoo et al., 2017). In a similar manner, *frq* RNA is directly  
66 targeted for turnover by rhythmic exosome activity in the late day (Guo et al., 2009). Splicing of  
67 the *frq* transcript is regulated by temperature (Colot et al., 2005), mirroring thermal regulation  
68 mechanisms in the clocks of *Drosophila* (Majercak et al., 1999) and *Arabidopsis* (James et al.,

69 2012). FRQ is an intrinsically disordered protein encoded by non-optimal codons to improve its  
70 co-translational folding (Zhou et al., 2013), and FRQ structure is also stabilized by its binding  
71 partner FRH (Hurley et al., 2013). PER2 is also largely intrinsically disordered, and indeed  
72 circadian clock proteins across species have large stretches of intrinsic disorder which are in the  
73 early stages of functional characterization (Pelham et al., 2020; Pelham et al., 2018) (reviewed  
74 in: (Partch, 2020)). Finally, an extremely conserved feature of the clock's negative arm is  
75 progressive phosphorylation and alteration of function over time (reviewed in: (Dunlap and  
76 Loros, 2018)). FRQ is progressively phosphorylated over the day (Baker et al., 2009), as are  
77 CRY1 and PER2 in the mammalian oscillator (Ode et al., 2017; Vanselow et al., 2006). A  
78 conserved phospho-switch in mammalian PER2 and fly PER proteins has been implicated in  
79 both temperature compensation and in closing the circadian feedback loop (Philpott et al., 2020;  
80 Top et al., 2018). Taken together, FRQ, PERs, and CRYs are tightly regulated and underlying  
81 mechanisms are often conserved between clock models.

82 In contrast, less is known about the mechanisms regulating expression of the other  
83 essential member of the negative arm complex, CKI, orthologs of which are highly conserved in  
84 sequence and in function across eukaryotic clocks. CKI forms a stable complex as FRQ-FRH-  
85 CKI $\alpha$  in *Neurospora* (Baker et al., 2009; Gorl et al., 2001), as PER-DOUBLETIME (DBT) in flies  
86 (Kloss et al., 2001), and as a multi-protein complex of PER-CRY-CKI $\delta$  in mouse (Aryal et al.,  
87 2017). Fungal CKI phosphorylates both FRQ and WCC (He et al., 2006). Insect DBT and  
88 mammalian CKI $\delta/\epsilon$  are key regulators of the PER2 phospho-switch, including phosphorylation of  
89 hPER2 at S662, which is associated with the human sleep and circadian disorder FASPS  
90 (Narasimamurthy et al., 2018; Philpott et al., 2020; Toh et al., 2001; Zhou et al., 2015).  
91 Significantly, mutation of human CKI $\delta$  itself phenocopies this, also leading to FASPS (Xu et al.,  
92 2005). CKI phosphorylations contribute to feedback loop closure in all species, and FRQ-CKI  
93 binding strength is a key regulator of period length in *Neurospora* (Liu et al., 2019). CKI  
94 abundance is not rhythmic in any species described to date (Gorl et al., 2001; Kloss et al.,  
95 2001), but preliminary evidence suggests that its expression levels are tightly controlled to keep  
96 the clock on time, just like FRQ/PER/CRY. In mammals, CKI knockdown or knock out  
97 significantly lengthens period (Isojima et al., 2009; Lee et al., 2009; Tsuchiya et al., 2016), and  
98 CKI $\delta$  levels are negatively regulated by m6A methylation (Fustin et al., 2018). In *Neurospora*,  
99 decreasing the amounts of the *casein kinase I (ck-1a)* transcript using a regulatable promoter  
100 leads to long period defects up to ~30 hours (Mehra et al., 2009). CKI has a conserved C-  
101 terminal domain involved in autophosphorylation and inhibition of kinase activity (Guo et al.,  
102 2019). Fungal mutants lacking this CKI C-terminal inhibitory domain have hyperactive kinase

103 activity (Querfurth et al., 2007) and display short periods. Across clock models, the circadian  
104 period is sensitive to CKI abundance and activity due to its importance in circadian feedback  
105 loop closure.

106 Our modern understanding of the circadian clock was founded on genetic screens and  
107 characterization of mutants with circadian defects (Feldman and Hoyle, 1973; Konopka and  
108 Benzer, 1971; Ralph and Menaker, 1988). The fungal clock model *Neurospora crassa* has been  
109 a top producer of relevant circadian mutants due to its genetic tractability, ease of circadian  
110 readout, and functional conservation with the animal circadian clock (reviewed in: (Loros,  
111 2020)). Forward genetic screens used the *ras-1<sup>bd</sup>* mutant background (which forms distinct  
112 bands of conidiophores once per subjective night) in race tube assays to identify key players in  
113 the circadian clock (Belden et al., 2007; Feldman and Hoyle, 1973; Sargent et al., 1966).  
114 Genetic epistasis among the *period* genes, and in some cases, genetic mapping of mutations  
115 was also performed using *N. crassa* (Feldman and Hoyle, 1976; Gardner and Feldman, 1981;  
116 Morgan and Feldman, 2001).

117 All but one of the extant *period* genes in *Neurospora* have been cloned, and their  
118 identities have expanded our knowledge of core-clock modifying processes. *period-4*, or  
119 Checkpoint Kinase 2 (Chk2), linked the clock to cell-cycle progression (Pregueiro et al., 2006).  
120 *period-3*, or Casein Kinase II (CKII), implicated direct phosphorylation of core clock proteins as  
121 central to temperature compensation (Mehra et al., 2009). *period-1* is an essential RNA-helicase  
122 that regulates the core clock under high nutrient environments (Emerson et al., 2015). *period-6*  
123 is a core subunit of the Nonsense-Mediated Decay (NMD) complex (Compton, 2003), although  
124 its circadian role remains cryptic. Among the available *period* genes, only *period-2* remains  
125 uncharacterized.

126 We have mapped the *period-2* mutation to NCU01019 using whole genome sequencing,  
127 and discovered its molecular identity; however, attributing its long period mutant phenotype to  
128 molecular function has remained elusive (Lambreghts, 2012). Equipped with the identity of  
129 PRD-2, we then followed up on the observation that the *prd-6* short period phenotype is  
130 completely epistatic to the *prd-2* mutant's long period (Morgan and Feldman, 1997, 2001). We  
131 find that PRD-6 and PRD-2 use distinct mechanisms to play opposing roles in regulating levels  
132 of the *casein kinase I* transcript in *Neurospora*, thus rationalizing the circadian actions of the two  
133 clock mutants whose roles in the clock were unknown. PRD-2 stabilizes the *ck-1a* mRNA  
134 transcript, and the clock-relevant domains and biochemical evaluation of the PRD-2 protein  
135 indicate that it acts as an RNA-binding protein. We genetically rescue the long period phenotype  
136 of *prd-2* mutants by expressing a hyperactive CKI allele and by titrating up *ck-1a* mRNA levels

137 using a regulatable promoter. The endogenous *ck-1a* transcript has a strikingly long 3' UTR,  
138 indicating that its mRNA could be subject to NMD during a normal circadian day. We confirm  
139 that *prd-6* mutants have elevated levels of *ck-1a* in the absence of NMD, and further rescue the  
140 short period defect of *prd-6* mutants by titrating down *ck-1a* mRNA levels using an inducible  
141 promoter. Taken together, a unifying model emerges to explain the action of diverse *period*  
142 mutants, where the *casein kinase I* transcript is subject to complex regulation by NMD and an  
143 RNA-binding protein, PRD-2, to control its gene expression and maintain a normal circadian  
144 period.

145

## 146 **Results**

147

### 148 **An Interstitial Inversion Identifies *prd-2*.**

149 Genetic mapping and preliminary analyses identified *period-2* as a recessive mutant with  
150 an abnormally long ~ 26 hour period length that mapped to the right arm of LG V (Morgan and  
151 Feldman, 1997, 2001). Genetic fine structure mapping using selectable markers flanking *prd-2*,  
152 in preparation for an anticipated chromosome walk, revealed an extensive region of suppressed  
153 recombination in the region of the gene, consistent with the existence of a chromosome  
154 inversion (Lambregts, 2012). PCR data consistent with this prompted whole genome  
155 sequencing that revealed a 322 kb inversion on chromosome V (Lambregts, 2012) in the  
156 original isolate strain hereafter referred to as *prd-2<sup>INV</sup>*. The left breakpoint of the inversion occurs  
157 in the 5' UTR of NCU03775, and its upstream regulatory sequences are displaced in the *prd-*  
158 *2<sup>INV</sup>* mutant. However, a knockout of NCU03775 (FGSC12475) has a wild-type circadian period  
159 length, unlike the long period *prd-2<sup>INV</sup>* mutant (Supplementary Figure 1). The next closest gene  
160 upstream of the left inversion is NCU03771, but its transcription start site (TSS) is > 7 kb away.  
161 The right breakpoint of the inversion occurs in the 5' UTR of NCU01019, disrupting 333 bases of  
162 its 5' UTR and its entire promoter region (Figure 1A – B). A knockout of NCU01019 has a 26  
163 hour long period, matching the *prd-2<sup>INV</sup>* long period phenotype (Figure 1C). The *prd-2<sup>INV</sup>* mutant  
164 has drastically reduced levels of NCU01019 gene expression in constant light and in the  
165 subjective evening (Figure 1D), suggesting that the inversion completely disrupts the  
166 NCU01019 promoter and TSS. Placing NCU01019 under the nutrient-responsive *qa-2*  
167 promoter, we find that the long period length occurs at very low gene expression levels using  
168 10<sup>-6</sup> M quinic acid induction (Figure 1E). Finally, ectopic expression of NCU01019 at the *csr-1*  
169 locus in the *prd-2<sup>INV</sup>* background rescues the long period phenotype (Figure 1F). We conclude  
170 that PRD-2 is encoded by NCU01019.

171

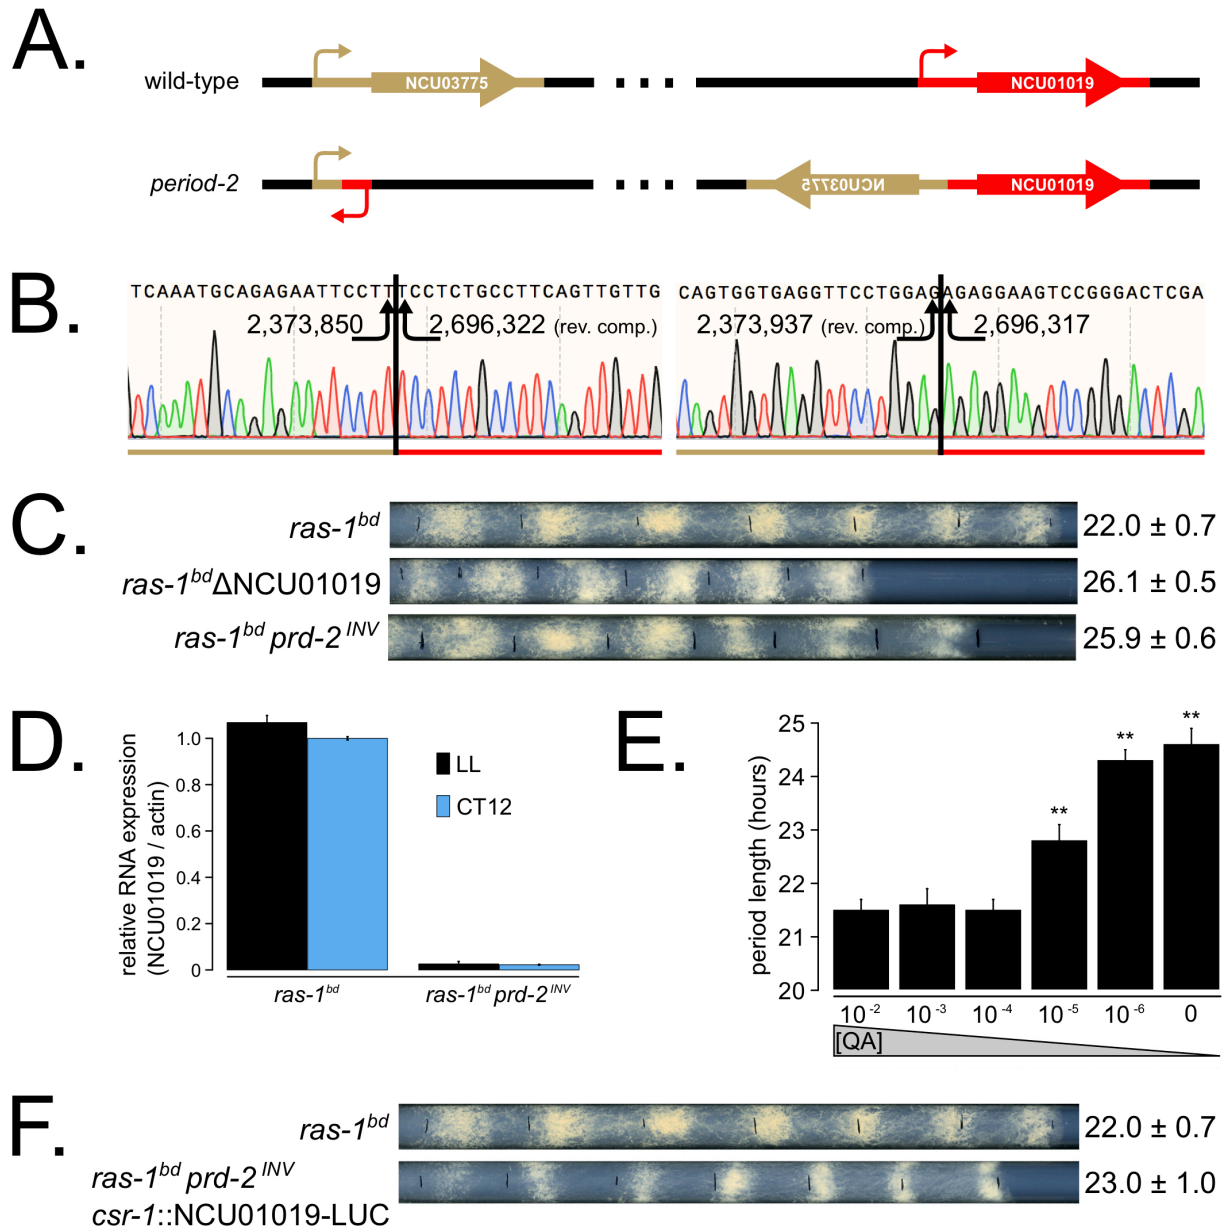

172

173 **Figure 1. The *period-2* phenotype derives from reduced expression of NCU01019.** Whole

174 genome sequencing identified a 322,386 bp inversion on linkage group V in the original *period-2*

175 mutant strain (Lambrechts, 2012). The inversion breakpoints disrupt two loci, NCU03775 and

176 NCU01019, depicted in cartoon form (A). Sanger sequencing confirms the DNA sequence of

177 the left and right breakpoints, and the corresponding NC12 genome coordinates are shown at

178 each arrowhead (B). Circadian period length was determined by race tube assay for *ras-1<sup>bd</sup>*

179 controls, targeted deletion of the NCU01019 locus, and the classically derived *prd-2<sup>INV</sup>* mutant.

180 The  $\Delta$ NCU01019 mutant has a long period and slow growth defect similar to *prd-2<sup>INV</sup>* (C).  
181 NCU01019 RNA expression levels are detectable by RT-qPCR in the *prd-2<sup>INV</sup>* mutant but are  
182 drastically reduced compared to *ras-1<sup>bd</sup>* controls grown in constant light or at subjective dusk  
183 CT12 (D). After replacing the endogenous promoter of NCU01019 with the inducible *qa-2*  
184 promoter, addition of high levels of quinic acid ( $10^{-2}$  –  $10^{-3}$  M) led to a normal circadian period by  
185 race tube assay ( $10^{-2}$  M  $\tau = 21.5 \pm 0.2$  hours;  $10^{-3}$  M  $\tau = 21.6 \pm 0.3$  hours;  $10^{-4}$  M  $\tau = 21.5 \pm 0.2$   
186 hours). Lower levels of QA inducer led to a long circadian period ( $10^{-5}$  M  $\tau = 22.8 \pm 0.3$  hours;  
187  $10^{-6}$  M  $\tau = 24.3 \pm 0.2$  hours; 0 QA  $\tau = 24.6 \pm 0.3$  hours) due to reduced NCU01019 expression.  
188 Asterisks (\*\*) indicate  $p < 1 \times 10^{-10}$  by student's t-test compared to  $10^{-2}$  M QA race tube results  
189 (E). The entire NCU01019 locus (plus 951 bases of its upstream promoter sequence) was fused  
190 in-frame with codon-optimized luciferase. Ectopic expression of this NCU01019-luc construct in  
191 the *prd-2<sup>INV</sup>* background rescues the long period phenotype by race tube assay (F).

192  
193

194 We mapped the clock-relevant domains of the PRD-2 protein (Figure 2A), finding that  
195 both an SUZ domain and the proline-rich C-terminus of PRD-2 are required for a normal clock  
196 period. This result was confirmed in two separate genetic backgrounds either by replacing the  
197 endogenous locus with domain deletion mutants (Figure 2B) or by ectopic expression of domain  
198 mutants at the *csr-1* locus in a  $\Delta$ *prd-2* background (Figure 2C) (Supplementary Table 1). The  
199 SUZ domain family can bind RNA directly *in vitro* (Song et al., 2008), but curiously PRD-2's  
200 adjacent R3H domain, which is better characterized in the literature as a conserved RNA-  
201 binding domain, is dispensable for clock function. The C-terminus of PRD-2 is predicted to be  
202 highly disordered, and finer mapping of this region showed that neither a glutamine/proline-rich  
203 domain (amino acids 525 – 612, 21% Gln, 26% Pro) nor a domain conserved across fungal  
204 orthologs (amino acids 625 – 682, 21% Pro) were required for normal clock function (Figure  
205 2C). The remainder of the C-terminus (amino acids 495 – 524, 28% Pro; 683 – 790, 24% Pro)  
206 contains a clock relevant region of PRD-2 based on deletion analyses. Further, PRD-2 SUZ  
207 domain and C-terminal deletion mutants are expressed at the protein level, indicating that clock  
208 defects must be due to the absent domain (Supplementary Figure 2A). PRD-2 is exclusively  
209 localized to the cytoplasm based on biochemical evaluation, and this localization does not  
210 change as a function of time of day (Figure 2D).

211

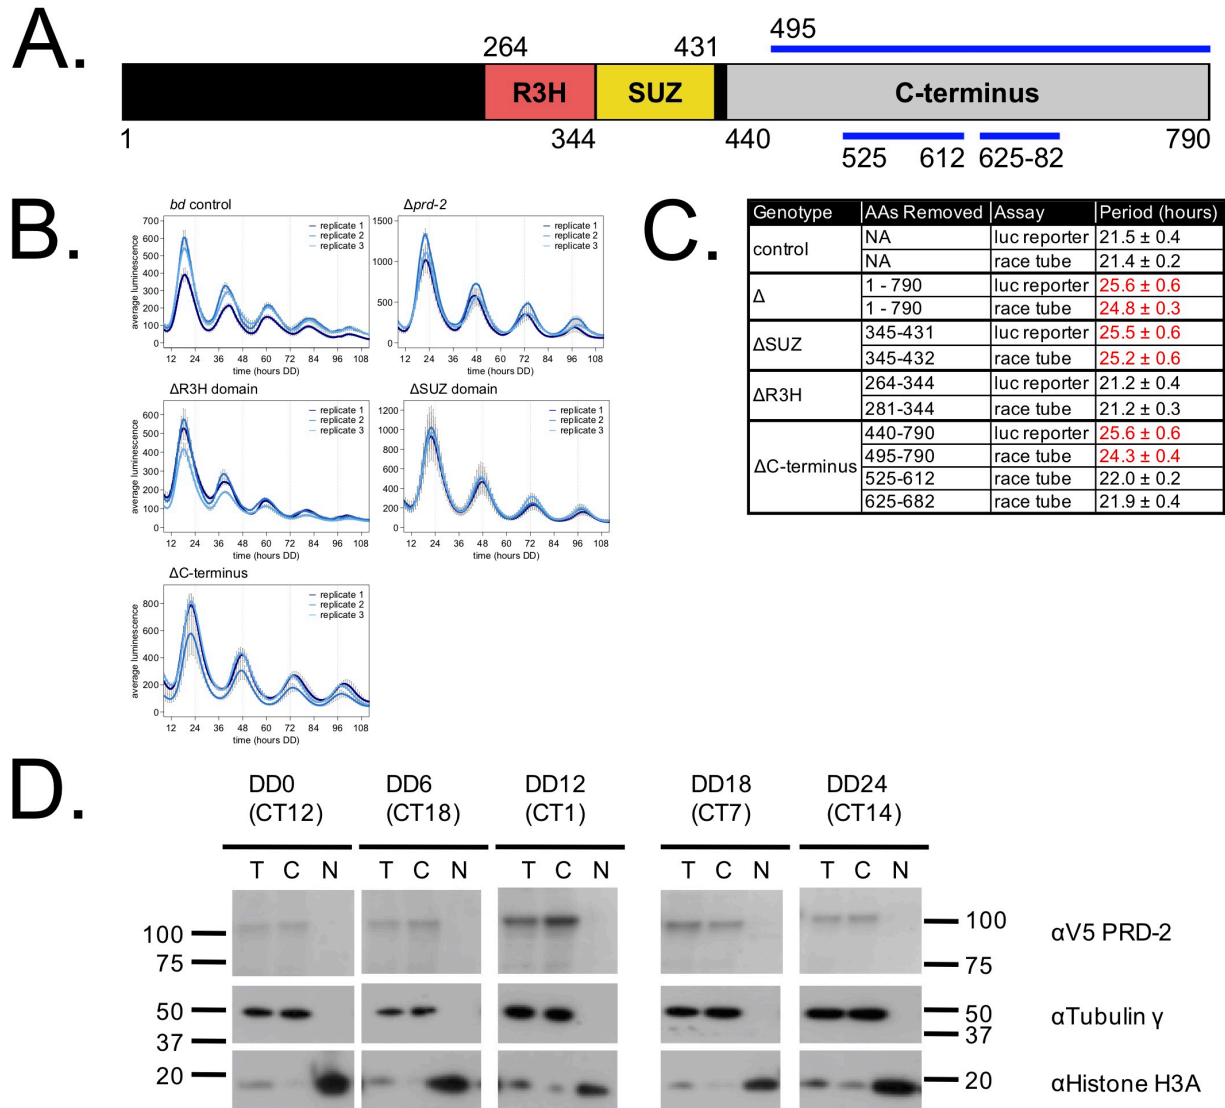

212  
 213 **Figure 2. Clock-relevant protein domains and localization of PRD-2 suggest and RNA-**  
 214 **binding function.** PRD-2 has tandemly arrayed R3H and SUZ domains associated with RNA  
 215 binding proteins, and its C-terminal region is highly enriched for proline (P) and glutamine (Q).  
 216 The cartoon of PRD-2 protein lists relevant amino acid coordinates (**A**). The native NCU01019  
 217 locus was replaced with single domain deletion mutants, and 96-well plate luciferase assays  
 218 were used to measure the circadian period length in triplicate wells per biological replicate  
 219 experiment. A wild-type clock period was recovered in *ras-1<sup>bd</sup>* controls and the *prd-2ΔR3H*  
 220 mutant, while *Δprd-2*, *prd-2ΔSUZ*, and *prd-2ΔC-terminus* had long period phenotypes (**B**).  
 221 Independently constructed strains targeted domain deletion mutants to the *csr-1* locus in a *Δprd-*  
 222 *2* background (Supplementary Table 1), and mutant period lengths were determined by race  
 223 tube assay. Period lengths (± 1 SD) show that the clock-relevant domains of PRD-2 are the



224 SUZ domain and the C-terminus (**C**). Total (T), Nuclear (N), and Cytosolic (C) fractions were  
225 prepared over a circadian time course (N = 1 per time point).  $\gamma$ -Tubulin (NCU03954) was used  
226 as a control for cytoplasmic localization and histone H3 (NCU01635) for nuclear localization.  
227 PRD-2 tagged with a C-terminal V5 epitope tag is localized to the cytoplasm throughout the  
228 circadian cycle (**D**).

229  
230

231 NCU01019 RNA expression is not induced by light (Wu et al., 2014) nor rhythmically  
232 expressed over circadian time (Hurley et al., 2014). NCU01019 protein is abundant and shows  
233 weak rhythms (Hurley et al., 2018) (Supplementary Figure 2B), which suggests that PRD-2  
234 oscillations are driven post-transcriptionally to peak in the early subjective morning, prior to the  
235 peak in the *frq* transcript (Aronson et al., 1994). Rhythms in PRD-2 protein expression were  
236 confirmed using a luciferase translational fusion (Supplementary Figure 2C), which peaked  
237 during the circadian day. *prd-2<sup>INV</sup>* and  $\Delta$ NCU01019 have a slight growth defect (Figure 1C) and  
238 are less fertile than wild-type as the female partner in a sexual cross (data not shown).  
239 Temperature and nutritional compensation of  $\Delta$ NCU01019 alone are normal (Supplementary  
240 Figure 3), which was expected given the normal TC profile of the *prd-2<sup>INV</sup>* mutant (Gardner and  
241 Feldman, 1981).

242

### 243 **PRD-2 Regulates CKI Levels.**

244 To identify the putative mRNA targets of PRD-2, we performed total RNA-Sequencing on  
245 triplicate samples of  $\Delta$ *prd-2* versus control grown in constant light at 25°C. Hundreds of genes  
246 are affected by loss of PRD-2, but we did not identify a consensus functional category or  
247 sequence motif(s) for the putative PRD-2 regulon (Supplementary Figure 4). Given the  
248 pleiotropic phenotypes of  $\Delta$ *prd-2*, we posit that PRD-2 plays multiple roles in the cell, including  
249 regulation of carbohydrate and secondary metabolism. Focusing specifically on core clock  
250 genes, we found that *ck-1a*, *frq*, *wc-2*, *ckb-1* (regulatory beta subunit of CKII), and *frh* were  
251 significantly altered in the absence of PRD-2 (Figure 3A). Pursuing the top two hits, we found  
252 that the CKI transcript was dramatically less stable in  $\Delta$ *prd-2* (Figure 3B), while *frq* mRNA  
253 stability was not significantly altered (Supplementary Figure 5). To demonstrate that PRD-2  
254 binds the *ck-1a* transcript *in vivo*, we used RNA immunoprecipitation after UV crosslinking  
255 (CLIP). The Pumilio family RNA-binding protein PUF4 (NCU16560) was previously shown to  
256 bind in the 3' UTR of *cbp3* (NCU00057), *mrp-1* (NCU07386), and other target genes identified  
257 by HITS-CLIP high-throughput sequencing (Wilinski et al., 2017). C-terminally tagged alleles of

258 PRD-2, PUF4, and an untagged negative control strain were used to immunoprecipitate  
 259 crosslinked RNAs (Materials & Methods). As expected, *cbp3* and *mrp-1* positive controls were  
 260 significantly enriched in the PUF4 CLIP sample compared to the negative IP (Figure 3C). *ck-1a*  
 261 is also enriched in the PRD-2 CLIP sample, demonstrating that the CKI transcript is a direct  
 262 target of the PRD-2 protein (Figure 3C).  
 263

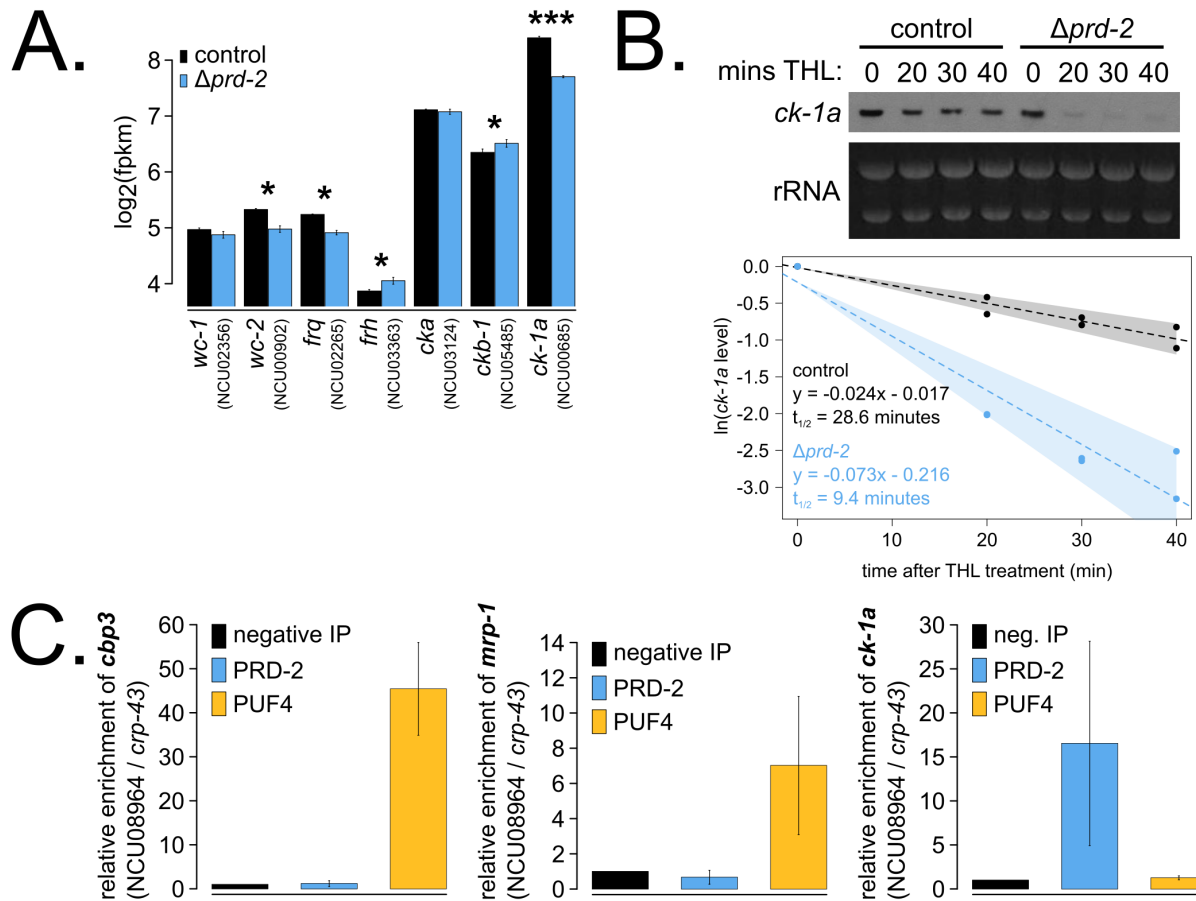

264  
 265 **Figure 3. The core clock target of PRD-2 is the *casein kinase I* transcript.** Control and  $\Delta\text{prd-}$   
 266 2 cultures were grown in the light at 25°C in Bird medium for 48 hours prior to RNA isolation.  
 267 Expression levels for core clock genes were measured by RNA-Sequencing (N = 3 biological  
 268 replicates per strain), and  $\log_2$ -transformed FPKM values are shown. Asterisks indicate  $p < 0.05$   
 269 (\*) or  $p < 5 \times 10^{-5}$  (\*\*\*) by student's t-test compared to control levels. The *ck-1a* transcript is > 1.5x  
 270 less abundant in  $\Delta\text{prd-2}$  (A). *ck-1a* mRNA degradation kinetics were examined by Northern blot  
 271 in a time course after treatment with thiolutin (THL) at approximately CT1 (N = 2 biological  
 272 replicates). RNA levels were quantified using ImageJ, natural log transformed, fit with a linear  
 273 model (g1m in R, Gaussian family defaults), and half-life was calculated assuming first order

274 decay kinetics ( $\ln(2)$  / slope). Shaded areas around the linear fit represent 95% confidence  
275 intervals on the slope. The *ck-1a* transcript is 3x less stable in  $\Delta prd-2$  (B). The PUF4  
276 (NCU16560) RNA-binding protein pulls down known target transcripts *cbp3* (NCU00057) and  
277 *mrp-1* (NCU07386) by RT-qPCR (N = 3 biological replicates). PRD-2 CLIP samples were  
278 processed in parallel with PUF4 positive controls, and PRD-2 binds the *ck-1a* transcript *in vivo*  
279 (C).

280  
281

282 Hypothesizing that the clock-relevant target of PRD-2 could be CKI, we used two genetic  
283 approaches to manipulate CKI activity in an attempt to rescue the  $\Delta prd-2$  long period  
284 phenotype. First, we placed the *ck-1a* gene under the control of the quinic acid inducible  
285 promoter (Mehra et al., 2009) and crossed this construct into the  $\Delta prd-2$  background. We found  
286 that increasing expression of *ck-1a* using high levels ( $10^{-1}$  –  $10^{-2}$  M) of QA partially rescued the  
287  $\Delta prd-2$  long period phenotype (Figure 4A). We also noticed a synergistic poor growth defect in  
288 the double mutant at  $10^{-4}$  M QA, consistent with low levels of *ck-1a* (an essential gene in  
289 *Neurospora*: (Gorl et al., 2001; He et al., 2006)). There are two explanations for the lack of full  
290 rescue to periods shorter than 25 hours in the  $P_{qa-2}$ -*ck-1a*  $\Delta prd-2$  double mutant: 1) even at  
291 saturating  $10^{-1}$  M QA induction, the *qa-2* promoter may not reach endogenous levels of *ck-1a*  
292 achieved under its native promoter, and/or 2) because PRD-2 acts directly as an RNA-binding  
293 protein for CKI transcripts, simply increasing levels of *ck-1a* RNA cannot fully rescue PRD-2's  
294 role in stabilizing or positioning CKI transcripts in the cytoplasm.

295 Next, we turned to a previously described fungal CKI constitutively active allele, CKI  
296 Q299<sup>STOP</sup> (Querfurth et al., 2007), reasoning that we might be able to rescue low *ck-1a* levels in  
297  $\Delta prd-2$  by genetically increasing CKI kinase activity. We replaced endogenous CKI with a  
298 CKI<sup>SHORT</sup> allele, which expresses only the shortest *ck-1a* isoform (361 amino acids). CKI<sup>SHORT</sup>  
299 lacks 23 amino acids in the C-terminal tail of the full length isoform that are normally subject to  
300 autophosphorylation leading to kinase inhibition. This CKI<sup>SHORT</sup> allele also carries an in-frame C-  
301 terminal HA3 tag and selectable marker, which displace the endogenous 3' UTR of *ck-1a*. The  
302 CKI<sup>SHORT</sup> mutant has a short period phenotype (~17 hrs), presumably due to hyperactive kinase  
303 activity and rapid feedback loop closure (Liu et al., 2019). Significantly, the CKI<sup>SHORT</sup> mutation is  
304 completely epistatic to  $\Delta prd-2$  (Figure 4B), indicating that CKI is the clock-relevant target of  
305 PRD-2.

306

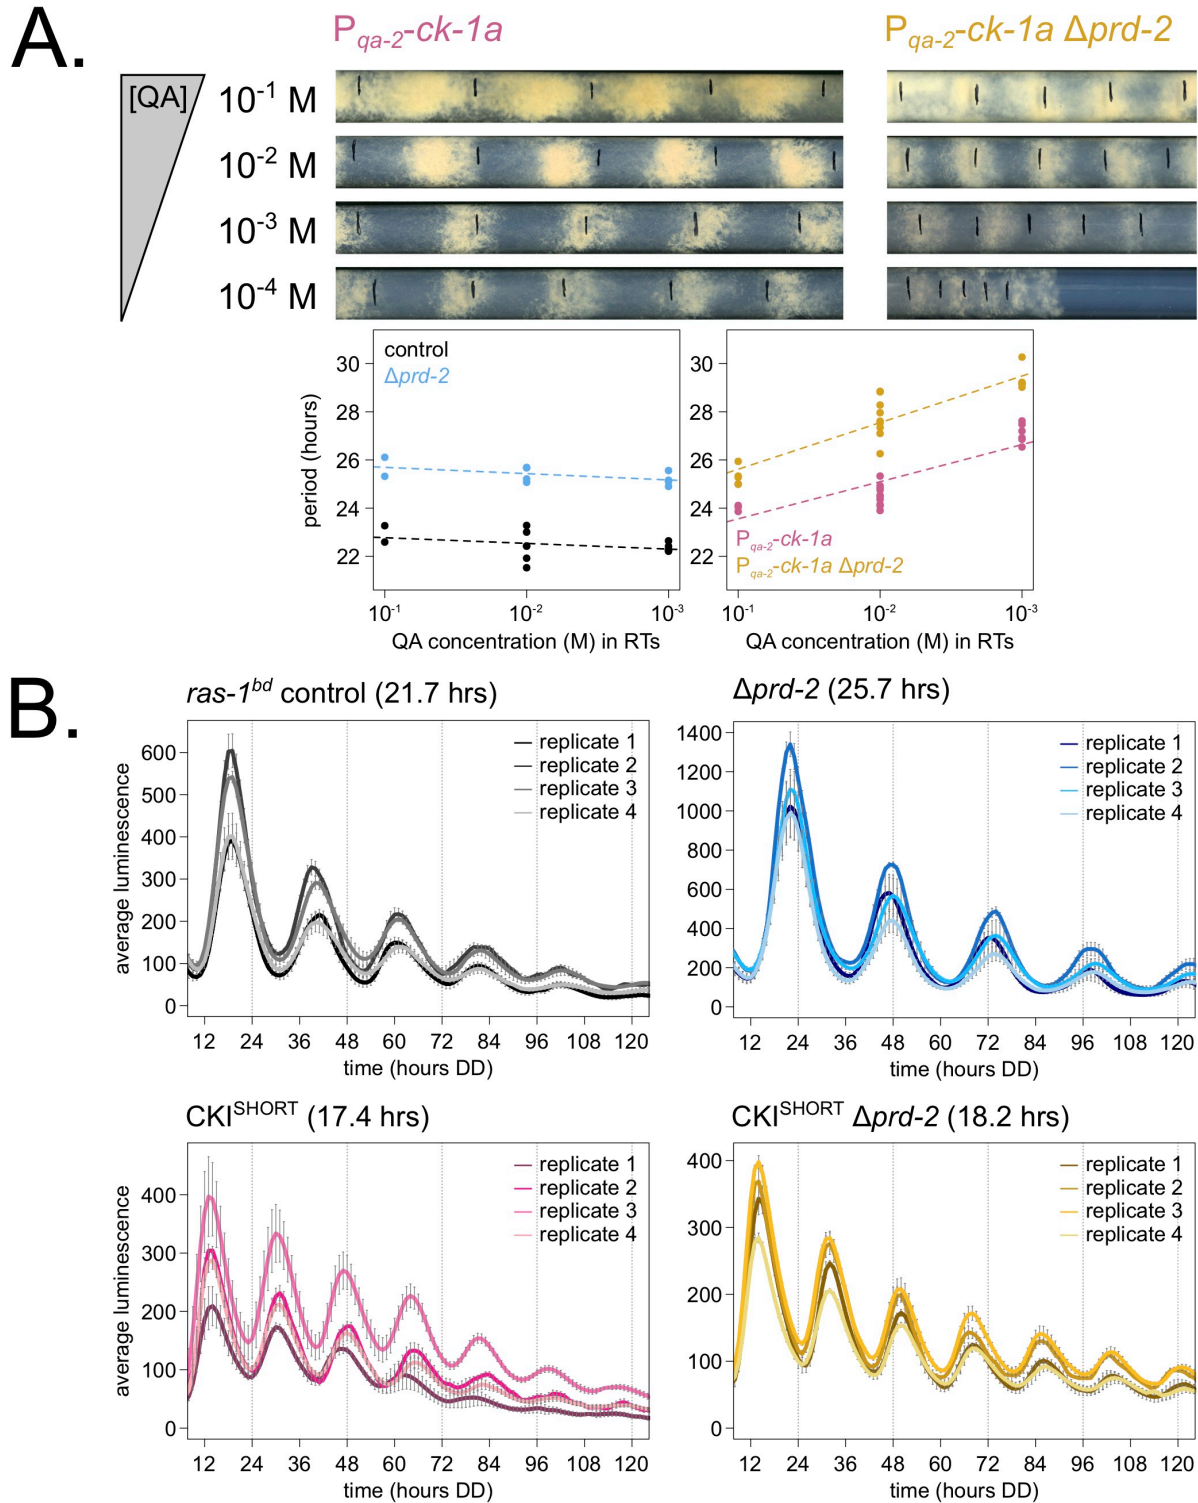

307

308

309

310

**Figure 4. Genetically increasing CKI levels or activity rescues the  $\Delta prd-2$  long period phenotype.** Representative race tubes from  $ras-1^{bd}$   $P_{qa-2-ck-1a}$  single (pink) and  $ras-1^{bd}$   $P_{qa-2-ck-1a}$   $\Delta prd-2$  double (yellow) mutants are shown with growth using the indicated concentrations

311 of quinic acid (QA) to drive expression of *ck-1a*. All results are shown in a scatterplot, where  
312 each dot represents one race tube's free running period length. *ras-1<sup>bd</sup>* controls (black) had an  
313 average period of  $22.5 \pm 0.5$  hours (N = 12), and period length was not significantly affected by  
314 QA concentration (ANOVA  $p = 0.297$ ). *ras-1<sup>bd</sup> Δprd-2* controls (blue) had an average period of  
315  $25.4 \pm 0.4$  hours (N = 10), and period length was not significantly affected by QA concentration  
316 (ANOVA  $p = 0.093$ ). Period length of *ras-1<sup>bd</sup> P<sub>qa-2</sub>-ck-1a* single mutants (pink) was significantly  
317 altered across QA levels (ANOVA  $p = 3.6 \times 10^{-6}$ ), and the average period at  $10^{-1}$  M QA was  $24.3$   
318  $\pm 0.5$  hours (N = 4). Period length of *ras-1<sup>bd</sup> P<sub>qa-2</sub>-ck-1a Δprd-2* double mutants (yellow) was also  
319 significantly affected by QA levels (ANOVA  $p = 8.1 \times 10^{-8}$ ), and the average period at  $10^{-1}$  M QA  
320 was  $25.4 \pm 0.4$  hours (N = 4). The double mutant period length was not genetically additive at  
321 high levels of QA induction (**A**). A hyperactive CKI allele was constructed by expressing the  
322 shortest isoform only (CKI<sup>SHORT</sup>). 96-well plate luciferase assays were used to measure the  
323 circadian period length. Traces represent the average of 3 technical replicates across 4  
324 biological replicate experiments for: *ras-1<sup>bd</sup>* controls (gray,  $\tau = 21.7 \pm 0.3$  hours), *ras-1<sup>bd</sup> Δprd-2*  
325 (blue,  $\tau = 25.7 \pm 0.6$  hours), *ras-1<sup>bd</sup> CKI<sup>SHORT</sup>* (pink,  $\tau = 17.4 \pm 0.3$  hours), and *ras-1<sup>bd</sup> CKI<sup>SHORT</sup>*  
326 *Δprd-2* double mutants (yellow,  $\tau = 18.2 \pm 0.3$ ). CKI<sup>SHORT</sup> is completely epistatic to *Δprd-2* in  
327 double mutants (**B**).

328

### 329 **Nonsense Mediated Decay Impacts the Clock by Regulating CKI Levels.**

330 Nonsense Mediated Decay (NMD) in *Neurospora crassa* is triggered by two different  
331 types of RNA structures. Open reading frames in 5' UTRs that produce short peptides (5'  
332 uORFs) can trigger NMD in a mechanism that does not require the Exon Junction Complex  
333 (Zhang and Sachs, 2015). The *frq* transcript has 6 such uORFs (Colot et al., 2005; Diernfellner  
334 et al., 2005) and could be a bona fide NMD target because its splicing is disrupted in the  
335 absence of NMD (Wu et al., 2017). In addition, transcripts with long 3' UTRs, with intron(s) near  
336 a STOP codon, and/or with intron(s) in the 3' UTR, can also be degraded by NMD after  
337 recruitment of the UPF1/2/3 complex by the Exon Junction Complex in a pioneering round of  
338 translation (Zhang and Sachs, 2015).

339 Since the observation by Compton (Compton, 2003) that the short period mutant *period-*  
340 *6* identified the UPF1 core subunit of the NMD pathway, the clock-relevant target(s) of NMD has  
341 been an object of conjecture and active research. Because loss of NMD reduces the amount of  
342 the transcript encoding the short-FRQ protein isoform (Wu et al., 2017), and strains making only  
343 short-FRQ have slightly lengthened periods (Liu et al., 1997), Wu et al. (2017) recently  
344 speculated that the short period of the *period-6<sup>UPF1</sup>* mutant might be explained by effects of

345 NMD on FRQ. However, strains expressing only long-FRQ display an essentially wild-type  
346 period length (Colot et al., 2005; Liu et al., 1997), not a short period phenotype like *prd-6*<sup>UPF1</sup>;  
347 this finding is not consistent with FRQ being the only or even principal clock-relevant target of  
348 NMD, leaving unresolved the role of NMD in the clock.

349 To tackle this puzzle, we returned to classical genetic epistasis experiments and  
350 confirmed the observation that *prd-6* is completely epistatic to *prd-2*<sup>INV</sup> (Morgan and Feldman,  
351 2001), going on to show that in fact each of the individual NMD subunit knockouts,  $\Delta upf2$  and  
352  $\Delta upf3$  as well as  $\Delta prd-6^{upf1}$ , is epistatic to the  $\Delta prd-2$  long period phenotype (Figure 5A).  
353 Previous work had profiled the transcriptome of  $\Delta prd-6$  compared to a control (Wu et al., 2017);  
354 we re-processed this RNA-Seq data and found, exactly as in  $\Delta prd-2$ , that *ck-1a* was the most  
355 affected core clock gene in  $\Delta prd-6$  (Figure 5B). The *ck-1a* transcript has an intron located 70 nt  
356 away from its longest isoform's STOP codon, and its 3' UTR is, remarkably, among the 100  
357 longest annotated UTRs in the entire *Neurospora* transcriptome (Figure 5C). Thus, *ck-1a* is a  
358 strong candidate for regulation by NMD.

359 We hypothesized that CKI is overexpressed in the absence of NMD (Figure 5B), leading  
360 to faster feedback loop closure and a short circadian period. To genetically control *ck-1a* levels,  
361 we crossed the regulatable  $P_{qa-2}$ -*ck-1a* allele into the  $\Delta prd-6$  background and confirmed our  
362 hypothesis by finding that at low levels of inducer (10<sup>-5</sup> M QA), decreased levels of *ck-1a*  
363 transcript revert the short period length of  $\Delta prd-6$  to control period lengths (Figure 5D). Further,  
364 protein levels of CKI in the  $\Delta prd-6$  background are reduced to control levels at 10<sup>-5</sup> M QA  
365 (Figure 5E), which explains the period rescue phenotype. CKI protein is 2-3x more abundant in  
366  $\Delta prd-6$  and in  $\Delta prd-2 \Delta prd-6$  (Figure 5F), matching its overexpression in the  $\Delta prd-6$   
367 transcriptome (Figure 5B). CKI protein is 3x reduced in  $\Delta prd-2$  (Figure 5F), also correlating with  
368 its reduced mRNA expression and stability (Figure 3). We conclude that CKI is also the clock-  
369 relevant target of PRD-6<sup>UPF1</sup>, placing NMD, PRD-2, and CKI in the same genetic epistasis  
370 pathway.  
371

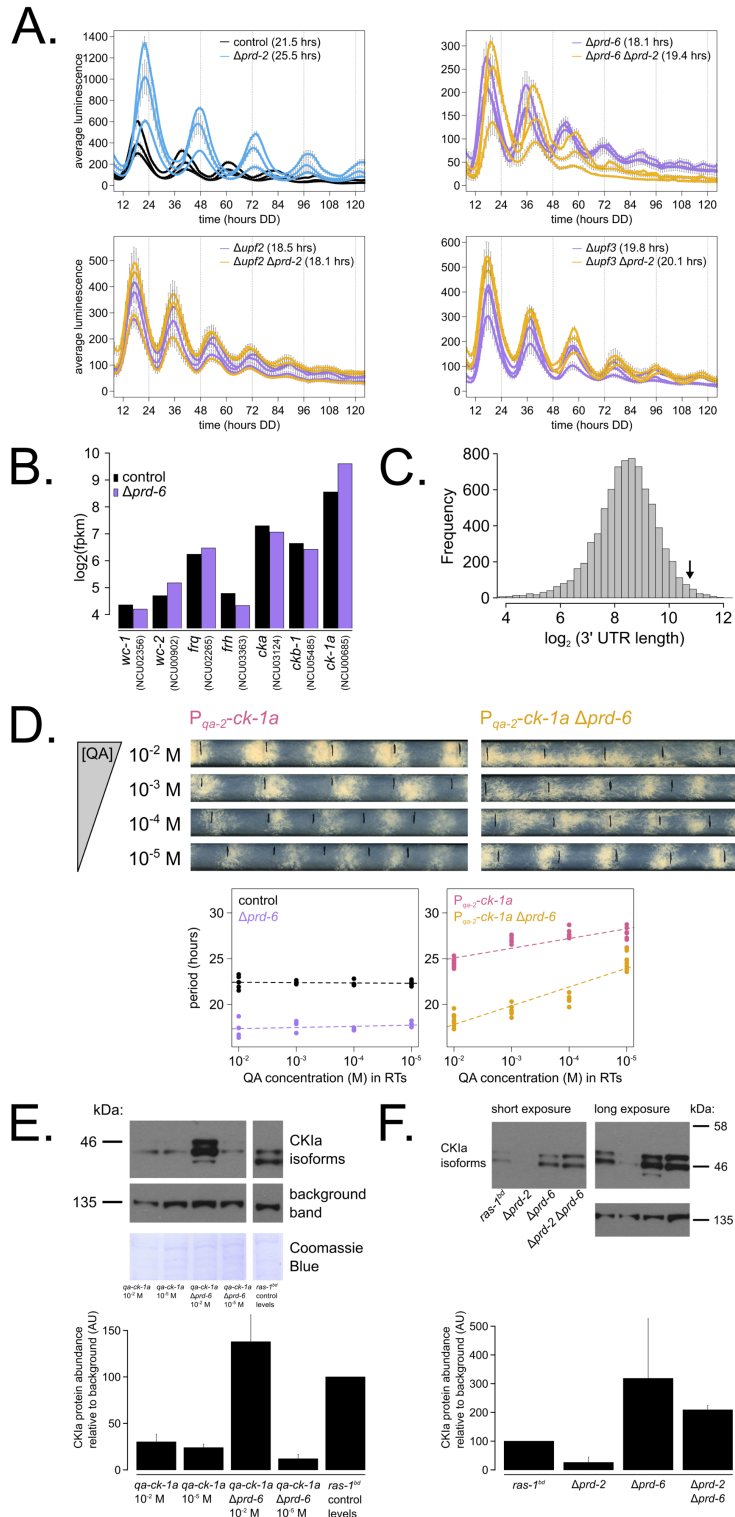

372

373

374

375

376 per three biological replicate experiments for: *ras-1<sup>bd</sup>* controls (black,  $\tau = 21.5 \pm 0.3$  hours), *ras-*  
377 *1<sup>bd</sup> Δprd-2* (blue,  $\tau = 25.5 \pm 0.4$  hours); *ras-1<sup>bd</sup> Δprd-6* (purple,  $\tau = 18.1 \pm 0.2$  hours), *ras-1<sup>bd</sup>*  
378 *Δprd-6 Δprd-2* double mutants (yellow,  $\tau = 19.4 \pm 0.7$  hours); *ras-1<sup>bd</sup> Δupf2* (purple,  $\tau = 18.5 \pm 0.5$   
379 hours), *ras-1<sup>bd</sup> Δupf2 Δprd-2* double mutants (yellow,  $\tau = 18.1 \pm 0.3$  hours); *ras-1<sup>bd</sup> Δupf3*  
380 (purple,  $\tau = 19.8 \pm 0.3$  hours), *ras-1<sup>bd</sup> Δupf3 Δprd-2* double mutants (yellow,  $\tau = 20.1 \pm 0.2$   
381 hours). Each individual NMD subunit knockout is epistatic to the *Δprd-2* long period phenotype  
382 (A). Raw RNA-Seq data from a previous study (Wu et al., 2017) were analyzed using the same  
383 pipeline as data from Figure 3A (see Materials & Methods). Control and *Δprd-6* gene expression  
384 levels ( $\log_2$ -transformed) are shown for core clock genes. The *ck-1a* transcript is > 2x more  
385 abundant in *Δprd-6* (B). 3' UTR lengths from 7,793 genes were mined from the *N. crassa*  
386 OR74A genome annotation (FungiDB version 45, accessed on 10/25/2019), and plotted as a  
387 histogram. The arrow marks the 3' UTR of *ck-1a*, which is 1,739 bp and within the top 100  
388 longest annotated UTRs in the entire genome (C). Representative race tubes from *ras-1<sup>bd</sup> P<sub>qa-2</sub>-*  
389 *ck-1a* single (pink) and *ras-1<sup>bd</sup> P<sub>qa-2</sub>-ck-1a Δprd-6* double (yellow) mutants are shown at the  
390 indicated concentrations of quinic acid to drive expression of *ck-1a*. All results are shown in a  
391 scatterplot, where each dot represents one race tube's free running period length. *ras-1<sup>bd</sup>*  
392 controls (black) had an average period of  $22.4 \pm 0.4$  hours (N = 20), and period length was not  
393 significantly affected by QA concentration (ANOVA  $p = 0.605$ ). *ras-1<sup>bd</sup> Δprd-6* controls (purple)  
394 had an average period of  $17.5 \pm 0.6$  hours (N = 16), and period length was not significantly  
395 affected by QA concentration (ANOVA  $p = 0.362$ ). Period length of *ras-1<sup>bd</sup> P<sub>qa-2</sub>-ck-1a* single  
396 mutants (pink) was significantly altered across QA levels (ANOVA  $p = 2.9 \times 10^{-8}$ ), and the  
397 average period at  $10^{-5}$  M QA was  $27.6 \pm 0.8$  hours (N = 8). Period length of *ras-1<sup>bd</sup> P<sub>qa-2</sub>-ck-1a*  
398 *Δprd-6* double mutants (yellow) was also significantly affected by QA levels (ANOVA  $p = 9.4 \times 10^{-$   
399  $12$ ), and the average period at  $10^{-5}$  M QA was  $24.7 \pm 0.9$  hours (N = 8). Thus, the double mutant  
400 period length was not genetically additive at low levels of QA induction, and the short period  
401 phenotype of *Δprd-6* is rescued (D). CKI protein levels were measured from the indicated  
402 genotypes grown in 0.1% glucose LCM medium with QA supplemented at the indicated  
403 concentrations for 48 hours in constant light. A representative immunoblot of 3 biological  
404 replicates is shown, and replicates are quantified in the bar graph relative to *ras-1<sup>bd</sup>* control CKI  
405 levels from a 2% glucose LCM culture (E). CKI protein levels were measured from the indicated  
406 genotypes grown in 2% glucose LCM medium for 48 hours in constant light. A representative  
407 immunoblot of 3 biological replicates is shown, and replicates are quantified in the bar graph  
408 relative to *ras-1<sup>bd</sup>* control CKI levels (F). CKI protein levels are increased in *Δprd-6*, decreased in



409 the  $\Delta prd-2$  mutant, and  $\Delta prd-6$  is epistatic to  $\Delta prd-2$  with respect to CKI levels and circadian  
410 period length.

411

## 412 Discussion

413 By uncovering the identity and mode of action of PRD-2 and exploring the mechanism of  
414 two classical *period* mutants, *prd-2* and *prd-6*, we found a common basis in regulation of CKI  
415 levels, which are under tight control in the *Neurospora* clock (Figure 6). That the mechanistic  
416 basis of action of two independently derived non-targeted clock mutants centers on regulation of  
417 the activity of a single enzyme, CKI, via two distinct mechanisms is noteworthy. Period-2  
418 encodes an RNA-binding protein (Figures 1-2) that stabilizes the CKI transcript (Figure 3B). We  
419 demonstrate that CKI is the most important core clock target of PRD-2 by rescuing its long  
420 period mutant phenotype with a hyperactive CKI allele (Figure 4B). The predominantly  
421 cytoplasmic localization of PRD-2 (Figure 2D) is consistent with its action in protecting *ck-1a*  
422 transcripts from NMD and rounds out the model. PTBP1, an RNA-binding protein, protects its  
423 target transcripts from NMD-mediated degradation by binding in the 3' UTR and blocking NMD  
424 recruitment in mouse (Ge et al., 2016), and future work will determine if PRD-2 functions  
425 similarly to PTBP1.

426

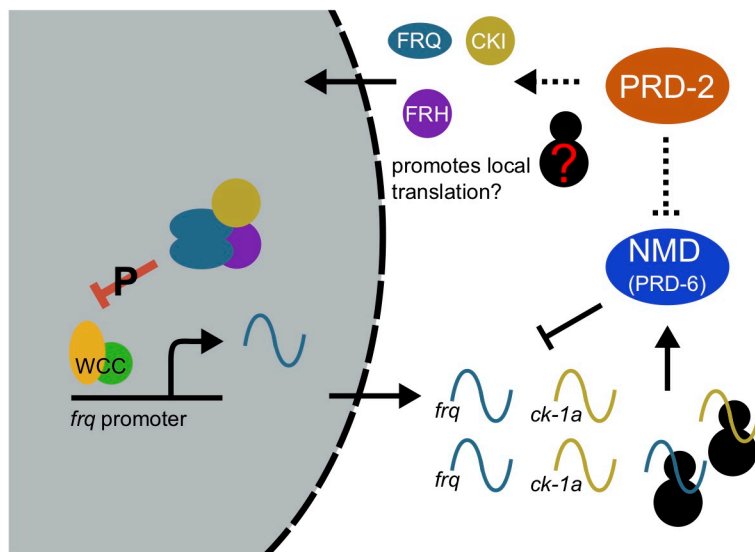

427

428 **Figure 6. Counter balancing regulation of CKI provides a unifying genetic model for the**  
429 **action of PRD-2 and PRD-6<sup>UPF-1</sup> in the circadian oscillator.** The NMD complex (PRD-6<sup>UPF-1</sup>,  
430 UPF2, and UPF3) targets the *freq* and *ck-1a* transcripts for degradation after the first round of  
431 translation (upstream uORFs in *freq*; long 3' UTR in *ck-1a*). PRD-2 binds to and stabilizes *ck-1a*

432 transcripts (dashed lines), which could also promote local translation and complex formation for  
433 the negative arm of the clock. In the absence of PRD-2, the long period phenotype is due to low  
434 CKI levels, and in the absence of NMD, the short period phenotype is due to high CKI levels.

435

436

437 PRD-6 and the NMD machinery target *ck-1a* mRNA for degradation to regulate its  
438 expression levels, presumably mediated by the long 3' UTR of *ck-1a* transcripts in *Neurospora*  
439 (Figure 5). NMD components are not rhythmic in abundance in the fungal clock (Hurley et al.,  
440 2014, 2018). These data, taken together with the constitutive expression of the CKI mRNA and  
441 protein (Baker et al., 2009; Gorl et al., 2001; Hurley et al., 2014, 2018), lead us to predict that  
442 NMD regulation of CKI occurs throughout the circadian cycle. To our knowledge the discovery  
443 of NMD regulation of CKI represents a wholly novel and potentially important mode of regulation  
444 for this pivotal kinase. Future work will investigate whether insect DBT and/or mammalian  
445 CKI $\delta/\epsilon$  (CSNK1D, CSNK1E) are also targets of NMD. Long UTR length appears to be  
446 conserved across CKI orthologs (Supplementary Figure 6). One previous study in *Drosophila*  
447 reported a circadian period defect in a tissue-specific NMD knockdown (Ri et al., 2019), but the  
448 behavioral rhythm was lengthened in UPF1-depleted insects unlike the short period defect  
449 observed in *Neurospora*. In mouse, both CKI $\epsilon$  and CLOCK display altered splicing patterns in  
450 the absence of UPF2 (Weischenfeldt et al., 2012). Most core clock proteins have at least one  
451 uORF in mammals (Millius and Ueda, 2017), altogether raising the possibility that multiple core  
452 clock genes are regulated by NMD. The importance of NMD has already been recognized and  
453 investigated in the plant clock, where alternative splicing leads to NMD turnover for 4 core clock  
454 and accessory mRNAs: GRP7, GRP8, TOC1, and ELF3 (reviewed in: (Mateos et al., 2018)).

455 CKI abundance and alternative isoforms strongly affect circadian period length. Low  
456 levels of CKI driven from an inducible promoter lead to long periods approaching 30 hours  
457 (Mehra et al., 2009) (Figure 4A). In the mammalian clock, decreased CKI expression also  
458 significantly lengthens period (Isojima et al., 2009; Lee et al., 2009; Tsuchiya et al., 2016). CKI  
459 is rendered hyperactive by removing its conserved C-terminal domain, a domain normally  
460 subject to autophosphorylation leading to kinase inhibition (Guo et al., 2019; Querfurth et al.,  
461 2007). We generated a CKI mutant expressing only this shortest CKI isoform, finding a 17.5  
462 hour short period phenotype in the absence of C-terminal autophosphorylation (Figure 4B).  
463 Based on prior work, increased CKI activity and/or abundance would be expected to increase  
464 FRQ-CKI affinity and lead to faster feedback loop closure (Liu et al., 2019), consistent with the  
465 short period phenotype. Curiously, this CKI short isoform is expressed at levels similar to the full

466 length isoform in *Neurospora* (as well as a third short isoform derived from an alternative splice  
467 acceptor event) (Figure 5F), and all isoforms interact with FRQ by immunoprecipitation  
468 (Querfurth et al., 2007). Why do natural isoforms arise without the auto-inhibitory C-terminus in  
469 *Neurospora*, and are these regulatory events required to keep the clock on time? Mammalian  
470 alternative isoforms *CKI $\delta$ 1* and *CKI $\delta$ 2* have different substrate preferences *in vitro*, which leads  
471 to differential phosphorylation of PER2 whereby *CKI $\delta$ 2* phosphorylation significantly stabilizes  
472 PER2 (Fustin et al., 2018). Adding further complexity, *CKI $\delta$ 1* and *CKI $\delta$ 2* isoform expression  
473 patterns appear to be tissue specific and are regulated by m6A RNA modification. Regulation of  
474 CKI levels and isoform expression is an important direction for future work in the circadian clock.  
475 Casein Kinase I has a diverse array of functions in eukaryotes and is critically important  
476 in human health (reviewed in: (Cheong and Virshup, 2011; Vielhaber and Virshup, 2001)). CKI  
477 overexpression is pathogenic in Alzheimer's Disease in addition to its role in circadian period  
478 regulation (Sundaram et al., 2019). Future work on regulation of CKI levels and isoform  
479 expression will shed light on CKI regulation in the clock, in development, and in disease.

480

## 481 **Materials and Methods**

482

### 483 ***Neurospora* strains and growth conditions.**

484 The *ras-1<sup>bd</sup> prd-2<sup>INV</sup>* strains 613-102 (*mat A*) and 613-43 (*mat a*) were originally isolated  
485 in the Feldman laboratory (Lewis, 1995). Strains used in this study were derived from the wild-  
486 type background (FGSC2489 *mat A*), *ras-1<sup>bd</sup>* background (87-3 *mat a* or 328-4 *mat A*),  $\Delta$ *mus-51*  
487 background (FGSC9718 *mat a*), or the Fungal Genetics Stock Center (FGSC) knockout  
488 collection as indicated (Supplementary Table 1). Strains were constructed by transformation or  
489 by sexual crosses using standard *Neurospora* methods  
490 (<http://www.fgsc.net/Neurospora/NeurosporaProtocolGuide.htm>). In the “c box-luc” core clock  
491 transcriptional reporter used throughout, a codon-optimized firefly luciferase gene is driven by  
492 the clock box in the *frequency* promoter (Gooch et al., 2008; Hurley et al., 2014; Larrondo et al.,  
493 2015). The clock reporter construct was targeted to the *csr-1* locus and selected on resistance  
494 to 5  $\mu$ g/ml cyclosporine A (Sigma # 30024) (Bardiya and Shiu, 2007).

495 Standard race tube (RT) medium was used for all race tubes (1X Vogel's Salts, 0.1%  
496 glucose, 0.17% arginine, 1.5% agar, and 50 ng/ml biotin). Where indicated, D-Quinic Acid  
497 (Sigma # 138622) was added from a fresh 1 M stock solution (pH 5.8). Standard 96-well plate  
498 medium was used for all camera runs (1X Vogel's Salts, 0.03% glucose, 0.05% arginine, 1.5%  
499 agar, 50 ng/ml biotin, and 25  $\mu$ M luciferin from GoldBio # 115144-35-9). Liquid cultures were

500 started from fungal plugs as described (Chen et al., 2009; Nakashima, 1981) or from a conidial  
501 suspension at  $1 \times 10^5$  conidia/ml. Liquid cultures were grown in 2% glucose Liquid Culture  
502 Medium (LCM) or in 1.8% glucose Bird Medium (Metzenberg, 2004) as indicated. QA induction  
503 experiments in liquid culture were performed in 0.1% glucose LCM medium with QA  
504 supplemented. All experiments were conducted at 25°C in constant light unless otherwise  
505 indicated.

506 Strains were genotyped by screening for growth on selection medium (5 µg/ml  
507 cyclosporine A, 400 µg/ml Ignite, and/or 200-300 µg/ml Hygromycin). PCR genotyping was  
508 performed on gDNA extracts from conidia incubated with Allele-In-One Mouse Tail Direct Lysis  
509 Buffer (Allele Biotechnology # ABP-PP-MT01500) according to the manufacturer's instructions.  
510 GreenTaq PCR Master Mix (ThermoFisher # K1082) was used for genotyping. Relevant  
511 genotyping primers for key strains are:

512 *ras-1<sup>bd</sup>* (mutant): 5' TGCGCGAGCAGTACATGCGAAT and 5'  
513 CCTGATTTGCGCGGACGAGATCGTA 3'

514 *ras-1<sup>WT</sup>* (NCU08823): 5' GCGCGAGCAGTACATGCGGAC 3' and 5'  
515 CCTGATTTGCGCGGACGAGATCGTA 3'

516 *prd-2<sup>WT</sup>* (NCU01019): 5' CACTTCCAGTTATCTCGTCAC 3' and 5'  
517 CACAACCTTGTTAGGCATCG 3'

518  $\Delta$ *prd-2::bar<sup>R</sup>* (KO mutant): 5' CACTTCCAGTTATCTCGTCAC 3' and 5'  
519 GTGCTTGTCTCGATGTAGTG 3'

520 *prd-2<sup>INV</sup>* (left breakpoint): 5' AGCGAGCTGATATGCCTTGT 3' and 5'  
521 CGACTTCCACCACTTCCAGT 3'

522 *prd-2<sup>INV</sup>* (right breakpoint): 5' TGTTTGTCCGGTGAAGATCA 3' and 5'  
523 GTCGTGGAATGGGAAGACAT 3'

524  $\Delta$ *prd-6::hyg<sup>R</sup>* (FGSC KO mutant): 5' CTGCAACCTCGGCCTCCT 3' and 5'  
525 CAGGCTCTCGATGAGCTGATG 3'

526 *bar<sup>R</sup>::P<sub>qa-2-ck-1a</sub>* (QA inducible CKI): 5' GTGCTTGTCTCGATGTAGTG 3' and 5'  
527 GATGTCGCGGTGGATGAACG 3'

528

## 529 **RNA stability assays.**

530 Control and  $\Delta$ *prd-2* liquid cultures grown in 1.8% glucose Bird medium were age-  
531 matched and circadian time (CT) matched to ensure that RNA stability was examined at the  
532 same phase of the clock. Control cultures were shifted to constant dark for 12 hours, and  $\Delta$ *prd-2*  
533 cultures were shifted to dark for 14 hours (~CT1 for 22.5-hour wild-type period and for 26-hour

534  $\Delta prd-2$  period; 46 hours total growth). Thiolutin (THL; Cayman Chemical # 11350) was then  
535 added to a final concentration of 12  $\mu\text{g/ml}$  to inhibit new RNA synthesis. Samples were collected  
536 every 10 minutes after THL treatment by vacuum filtration and flash frozen in liquid nitrogen.  
537 THL has multiple off-target effects in addition to inhibiting transcription (Lauinger et al., 2017).  
538 For this reason, *frq* mRNA degradation kinetics were also examined with an alternative protocol.  
539 Light-grown, age-matched liquid Bird cultures of wild-type and  $\Delta prd-2$  were shifted into the dark  
540 and sampled every 10 minutes to measure *frq* turnover; transcription of *frq* ceases immediately  
541 on transfer to darkness (Heintzen et al., 2001; Tan et al., 2004). All tissue manipulation in the  
542 dark was performed under dim red lights, which do not reset the *Neurospora* clock (Chen et al.,  
543 2009).

544

#### 545 **RNA isolation and detection.**

546 Frozen *Neurospora* tissue was ground in liquid nitrogen with a mortar and pestle. Total  
547 RNA was extracted with TRIzol (Invitrogen # 15596026) and processed as described (Chen et  
548 al., 2009). RNA samples were prepared for RT-qPCR, Northern Blotting, RNA-Sequencing, or  
549 stored at  $-80^{\circ}\text{C}$ .

550 For RT-qPCR, cDNA was synthesized using the SuperScript III First-Strand synthesis kit  
551 (Invitrogen # 18080-051). RT-qPCR was performed using SYBR green master mix (Qiagen #  
552 204054) and a StepOne Plus Real-Time PCR System (Applied Biosystems).  $C_t$  values were  
553 determined using StepOne software (Life Technologies) and normalized to the *actin* gene ( $\Delta C_t$ ).  
554 The  $\Delta\Delta C_t$  method was used to determine mRNA levels relative to a reference time point.

555 Relevant RT-qPCR primer sequences are: *prd-2* (NCU01019): 5'

556 GGGCAACGACGTCAAACCTAT 3' and 5' TGCGTGTACATCACTCTGGA 3'. *actin* (NCU04173):  
557 5' GGCCGTGATCTTACCGACTA 3' and 5' TCTCCTTGATGTCACGAACG 3'.

558 Northern probes were first synthesized using the PCR DIG Probe Synthesis Kit (Roche #  
559 11 636 090 910). The 512 bp *frq* probe was amplified from wild-type *Neurospora* genomic DNA  
560 with primers: 5' CTCTGCCTCCTCGCAGTCA 3' and 5'  
561 CGAGGATGAGACGTCCTCCATCGAAC 3'. The 518 bp *ck-1a* probe was amplified with  
562 primers: 5' CCATGCCAAGTCGTTTCATCC 3' and 5' CGGTCCAGTCAAAGACGTTAGTC 3'. Total  
563 RNA samples were prepared according to the NorthernMax™-Gly Kit instructions (Invitrogen #  
564 AM1946). Equal amounts of total RNA (5 – 10  $\mu\text{g}$ ) were loaded per lane of a 0.8 – 1% w/v  
565 agarose gel. rRNA bands were visualized prior to transfer to validate RNA integrity. Transfer  
566 was completed as described in the NorthernMax™-Gly instructions onto a nucleic acid  
567 Amersham Hybond-N+ membrane (GE # RPN303B). Transferred RNA was crosslinked to the

568 membrane using a Stratalinker UV Crosslinker. The membrane was blocked and then incubated  
569 overnight at 42°C in hybridization buffer plus the corresponding DIG probe. After washing with  
570 NorthernMax™-Gly Kit reagents, subsequent washes were performed using the DIG Wash and  
571 Block Buffer Set (Roche # 11 585 762 001). Anti-Digoxigenin-AP Fab fragments were used at  
572 1:10,000. Chemiluminescent detection of anti-DIG was performed using CDP-Star reagents  
573 from the DIG Northern Starter Kit (Roche # 12 039 672 910). Densitometry was performed in  
574 ImageJ.

575 Total RNA was submitted to Novogene for stranded polyA+ library preparation and  
576 sequencing. 150 bp paired-end (PE) read libraries were prepared, multiplexed, and sequenced  
577 in accordance with standard Illumina HiSeq protocols.  $24.8 \pm 1.7$  million reads were obtained for  
578 each sample. Raw FASTQ files were aligned to the *Neurospora crassa* OR74A NC12 genome  
579 (accessed September 28, 2017 via the Broad Institute:  
580 [ftp://ftp.broadinstitute.org/pub/annotation/fungi/neurospora\\_crassa/assembly/](ftp://ftp.broadinstitute.org/pub/annotation/fungi/neurospora_crassa/assembly/)) using STAR  
581 (Dobin et al., 2013). On average,  $97.6 \pm 0.3\%$  of the reads mapped uniquely to the NC12  
582 genome. Aligned reads were assembled into transcripts, quantified, and normalized using  
583 Cufflinks2 (Trapnell et al., 2013). Triplicate control and  $\Delta prd-2$  samples were normalized  
584 together with CuffNorm, and the resulting FPKM output was used in the analyses presented.  
585 RNA-Sequencing data have been submitted to the NCBI Gene Expression Omnibus (GEO;  
586 <https://www.ncbi.nlm.nih.gov/geo/>) under accession number GSE155999.

587

#### 588 **CLIP assay.**

589 CLIP was performed using PUF4 (NCU16560) as a positive control RNA-binding protein  
590 from (Wilinski et al., 2017), with modifications. *Neurospora* strains containing endogenous locus  
591 C-terminally VHF tagged PUF4, PRD-2, or untagged negative control were used  
592 (Supplementary Table 1). Liquid cultures were grown in 2% glucose LCM for 48 hours in  
593 constant light. Tissue was harvested by vacuum filtration and fixed by UV crosslinking for 7  
594 minutes on each side of the fungal mat (Stratalinker UV Crosslinker 1800 with 254-nm  
595 wavelength bulbs). UV crosslinked tissue was frozen in liquid nitrogen and ground into a fine  
596 powder with a mortar and pestle. Total protein was extracted in buffer (25 mM Tris-HCl pH 7.4,  
597 150 mM NaCl, 2 mM MgCl<sub>2</sub>, 0.5% NP-40, 1 mM DTT, 1x cOmplete protease inhibitor, 100 U /  
598 ml RNase Out) and concentration determined by Bradford Assay. Approximately 10 mg of total  
599 protein was added to 30  $\mu$ l anti-FLAG M2 magnetic beads (Sigma # M8823) prepared according  
600 to the manufacturer's instructions. Beads and lysate were rotated for 4 hours at 4°C, followed by  
601 4 washes in 750  $\mu$ l extraction buffer. Bound RNA-binding proteins were eluted with 100  $\mu$ l 0.1 M

602 glycine-HCl pH 3.0 for 10 minutes. The supernatant was collected using a magnetic rack (NEB  
603 S1506S) and neutralized in 10  $\mu$ l of 1 M Tris pH 8.0. The elution was incubated with 300  $\mu$ l of  
604 TRIzol (Invitrogen # 15596026) for 10 minutes to extract RNA. Total RNA was isolated, DNase  
605 treated, and concentrated using the Direct-zol RNA Microprep Kit (Zymo # R2062) following the  
606 manufacturer's instructions.

607 Equal amounts of immunoprecipitated RNA (~ 50 ng) were converted into cDNA using  
608 the oligo(dT) method from the SuperScript IV First-Strand synthesis kit (Invitrogen # 18091-  
609 050). RT-qPCR was performed using SYBR green master mix (Qiagen # 204054) and a  
610 StepOne Plus Real-Time PCR System (Applied Biosystems).  $C_t$  values were determined using  
611 StepOne software (Life Technologies) and normalized to the *crp-43* gene ( $\Delta C_t$ ) instead of the  
612 *actin* (NCU04173) gene because *actin* is a putative PUF4 target by HITS-CLIP (Wilinski et al.,  
613 2017). The  $\Delta\Delta C_t$  method was used to determine target mRNA enrichment relative to the  
614 negative IP sample. Relevant RT-qPCR primer sequences were designed to flank introns: *cbp3*  
615 (NCU00057; PUF4 target): 5' CGAGAAATTCGGCCTTCTCCC 3' and 5'  
616 GCCTGGTGGAAGAAGTGGT 3'. *mrp-1* (NCU07386; PUF4 target): 5'  
617 TAGTAGGCACCGACTTTGAGCA 3' and 5' CGGGGACAGGTGGTTCGAA 3'. *ck-1a*  
618 (NCU00685; PRD-2 target): 5' CGCAAACATGACTACCATG 3' and 5'  
619 CTCTCCAGCTTGATGGCA 3'. *crp-43* (NCU08964; normalization control): 5'  
620 CTGTCCGTACTCGTACTCC 3' and 5' ACCATCGATGAGGAGCTTGC 3'.

621

## 622 **Protein isolation and detection.**

623 Frozen *Neurospora* tissue was ground in liquid nitrogen with a mortar and pestle. Total  
624 protein was extracted in buffer (50 mM HEPES pH 7.4, 137 mM NaCl, 10% glycerol v/v, 0.4%  
625 NP-40 v/v, and cOmplete Protease Inhibitor Tablet according to instructions for Roche # 11 836  
626 170 001) and processed as described (Garceau et al., 1997). Protein concentrations were  
627 determined by Bradford Assay (Bio-Rad # 500-0006). For Western blots, equal amounts of total  
628 protein (10 - 30  $\mu$ g) were loaded per lane into 4-12% Bis-Tris Bolt gels (Invitrogen #  
629 NW04125BOX). Western transfer was performed using an Invitrogen iBlot system (# IB21001)  
630 and PVDF transfer stack (# IB401001). Primary antibodies used for Western blotting were anti-  
631 V5 (1:3000, ThermoFisher # R960-25), anti-Tubulin alpha (1:10,000, Fitzgerald # 10R-T130a),  
632 or anti-CK1a (1:1000, rabbit raised). The secondary antibodies, goat anti-mouse or goat anti-  
633 rabbit HRP, were used at 1:5000 (Bio-Rad # 170-6516, # 170-6515). SuperSignal West Pico  
634 PLUS Chemiluminescent Substrate (ThermoFisher # 34578) or Femto Maximum Sensitivity

635 Substrate (Thermo # 34095) was used for detection. Immunoblot quantification and  
636 normalization were performed in ImageJ.

637 Nuclear and cytosolic fractions were prepared as previously described (Hong et al.,  
638 2008). Approximately 10  $\mu$ g of total protein from each fraction were loaded for immunoblotting.  
639 Primary antibodies for fraction controls were histone H3A (Fitzgerald) and  $\gamma$ -tubulin (Abcam).  
640 HRP-conjugated secondary antibodies (Bio-Rad) were used with SuperSignal West Pico ECL  
641 (Thermo) for detection.

642

#### 643 **Luciferase reporter detection and data analysis.**

644 96-well plates were inoculated with conidial suspensions from strains of interest and  
645 entrained in 12 hour light:dark cycles for 2 days in a Percival incubator at 25°C. Temperature  
646 inside the Percival incubator was monitored using a HOBO logger device (Onset # MX2202)  
647 during entrainment and free run. Plates were then transferred into constant darkness to initiate  
648 the circadian free run. Luminescence was recorded using a Pixis 1024B CCD camera  
649 (Princeton Instruments). Light signal was acquired for 10 – 15 minutes every hour using  
650 LightField software (Princeton Instruments, 64-bit version 6.10.1). The average intensity of each  
651 well was determined using a custom ImageJ Macro (Larrondo et al., 2015), and background  
652 correction was performed for each frame. Results from two different algorithms were averaged  
653 together to determine circadian period from background-corrected luminescence traces. The  
654 MESA algorithm was used as previously described (Kelliher et al., 2020). A second period  
655 measurement was obtained from an ordinary least squares autoregressive model to compute  
656 the spectral density (in R: `spec.ar(..., method = "ols")`). Race tube period lengths were  
657 measured from scans using ChronOSX 2.1 software (Roenneberg and Taylor, 2000).

658

#### 659 **Data visualization.**

660 All figures were plotted in R, output as scalable vector graphics, formatted using  
661 Inkscape, and archived in R markdown format. Data represent the mean of at least three  
662 biological replicates with standard deviation error bars, unless otherwise indicated.

663

664

665

666

667

668



669 **Supplementary Figures**

670

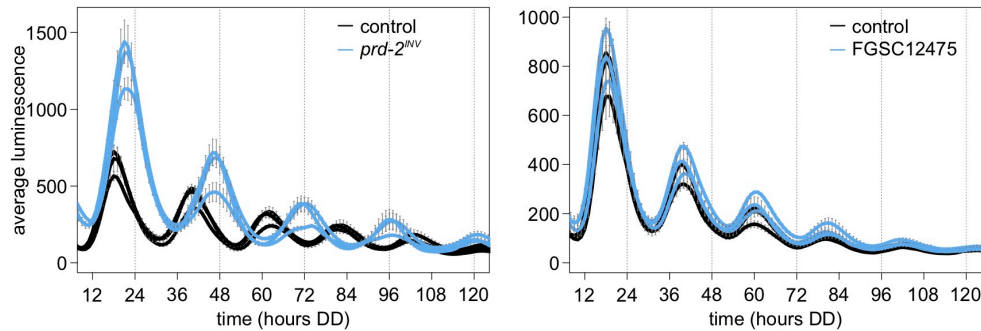

671

672 **Supplementary Figure 1. NCU03775 knockout has a normal circadian period and does**

673 **not explain the *prd-2<sup>INV</sup>* phenotype.** 96-well plate luciferase assays were used to measure the

674 circadian period length. Traces represent the average of 3 technical replicates across 3

675 biological replicate experiments for: *ras-1<sup>bd</sup>* controls (black,  $\tau = 21.9 \pm 0.3$  hours), *ras-1<sup>bd</sup> prd-2<sup>INV</sup>*

676 (blue,  $\tau = 25.6 \pm 0.4$  hours), wild-type controls (black,  $\tau = 21.7 \pm 0.3$  hours), and the knockout

677 strain FGSC12475 (blue,  $\tau = 21.7 \pm 0.3$  hours).  $\Delta$ NCU03775 has a wild-type circadian period

678 length.

679

680

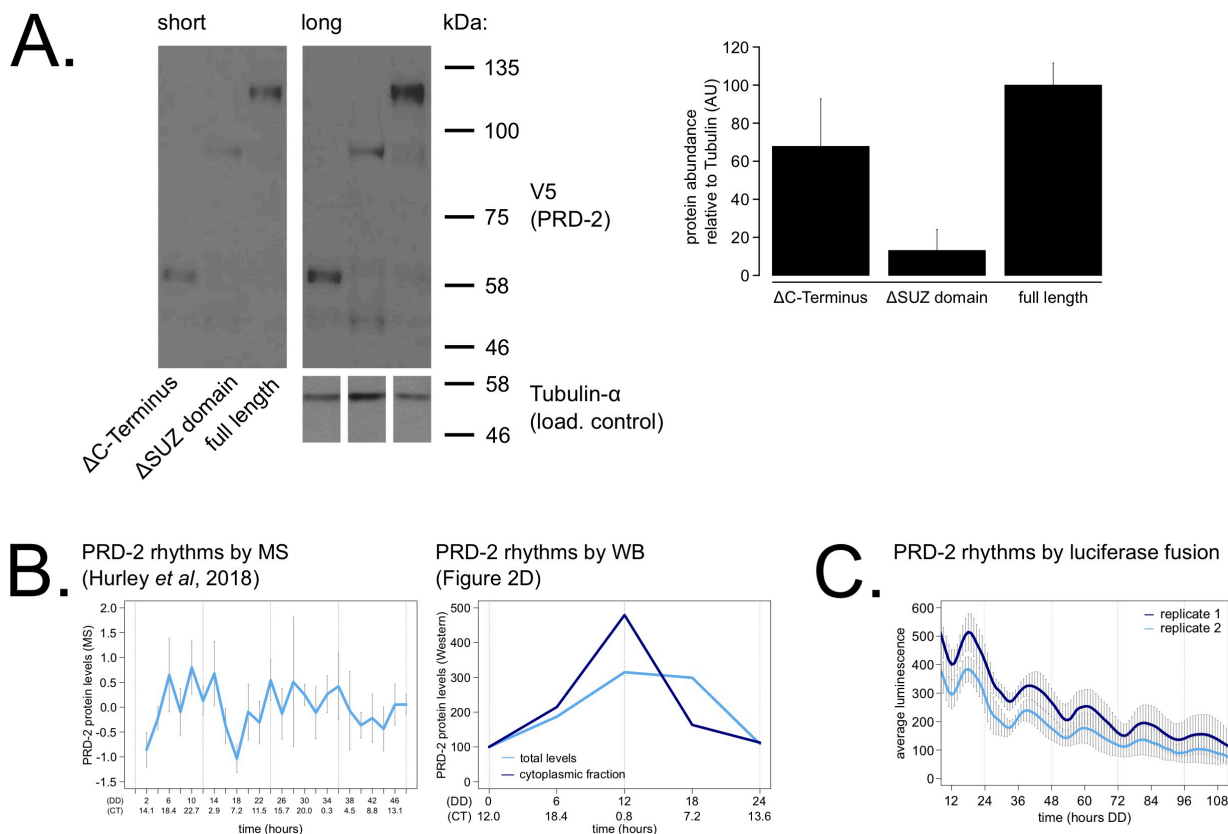

681  
 682 **Supplementary Figure 2. PRD-2 protein levels are slightly rhythmic and are detectable in**  
 683 **protein domain deletion mutants.** PRD-2 protein levels were measured from at least 3  
 684 biological replicates using strains where the endogenous NCU01019 locus was replaced with  
 685 V5-tagged domain deletion constructs: *prd-2*ΔC-Terminus(Δ440-790), *prd-2*ΔSUZ(Δ345-431),  
 686 and full length. Long and short exposures of a representative immunoblot are shown with  
 687 quantification relative to tubulin loading controls (**A**). The C-Terminal deletion strain has ~68%  
 688 PRD-2 levels compared to the full length control, and the SUZ deletion has ~13% levels. Both  
 689 are above the low levels of *qa*-driven NCU01019 needed to induce the long period phenotype  
 690 (Figure 1E). MS data from a previous study (Hurley *et al.*, 2018) revealed low amplitude rhythms  
 691 in PRD-2 abundance with a broad peak in the subjective circadian night and early morning (~  
 692 CT18 – 2). Circadian Time (CT) was calculated as described previously (Kelliher *et al.*, 2020).  
 693 PRD-2 abundance was also quantified from the localization time course (Figure 2D) relative to  
 694 tubulin and relative to the first time point. Peak PRD-2 protein abundance was observed in the  
 695 subjective morning from both MS and immunoblot data (**B**), corresponding with the rise in *frq*  
 696 transcript levels (Aronson *et al.*, 1994). To confirm rhythms in PRD-2 protein expression, the  
 697 complete NCU01019 5' UTR and coding sequence, plus 951 bp of upstream promoter  
 698 sequence, was fused in-frame with codon-optimized luciferase (Gooch *et al.*, 2008), not

699 including its endogenous 3' UTR sequence. This construct was transformed into the *prd-2*<sup>WT</sup>  
700 background at the *csr-1* locus, and PRD-2 protein cycles in abundance ( $\tau = 21.7 \pm 0.8$  hours).  
701 PRD-2 protein peaks during the circadian day (CT7.5  $\pm$  1) by luciferase fusion (C), slightly  
702 delayed relative to its morning peak by Western and MS.

703  
704

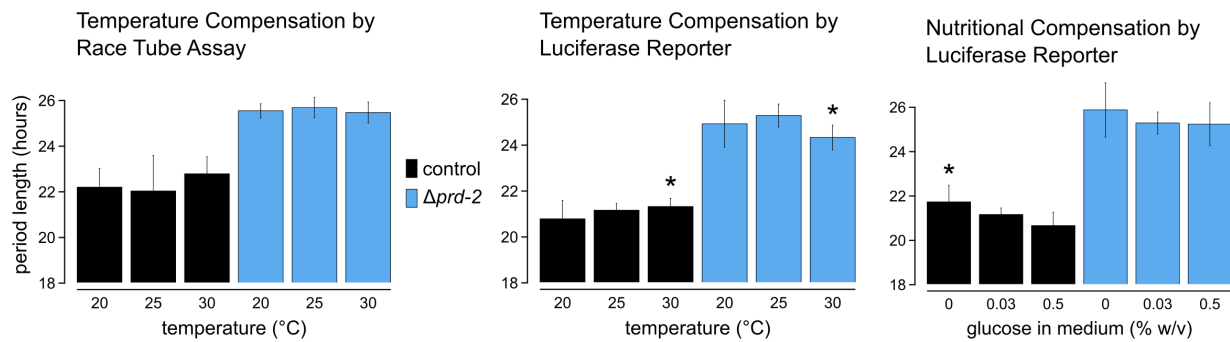

705

706 **Supplementary Figure 3. Temperature and nutritional compensation are normal in**

707  **$\Delta NCU01019$ .** Temperature and nutritional compensation were assessed in *ras-1*<sup>bd</sup> controls  
708 compared to *ras-1*<sup>bd</sup>  $\Delta prd-2$ . Race tubes were incubated at 20°, 25°, or 30°C to determine free  
709 running period length. Temperature did not significantly affect period length for controls (ANOVA  
710  $p = 0.598$ ) or for the  $\Delta prd-2$  mutant (ANOVA  $p = 0.756$ ) race tubes. 96-well plates were  
711 incubated at 20°, 25°, or 30°C to determine free running period length. Period was significantly  
712 different at 30°C for both genotypes (Asterisks (\*): control 20°C vs 30°C, Tukey Test  $p = 0.023$ ;  
713  $\Delta prd-2$  20°C vs 30°C, Tukey Test  $p = 0.037$ ;  $\Delta prd-2$  25°C vs 30°C, Tukey Test  $p = 0.0002$ ). 96-  
714 well plates were run with 0%, 0.03%, or 0.5% glucose w/v to test nutritional compensation.  
715 Period length was significantly different at 0% glucose for controls only (Asterisk (\*): control 0%  
716 vs 0.5%, Tukey Test  $p = 0.00005$ ; control 0% vs 0.03%, Tukey Test  $p = 0.034$ ;  $\Delta prd-2$  ANOVA  $p$   
717 = 0.183).

718

719

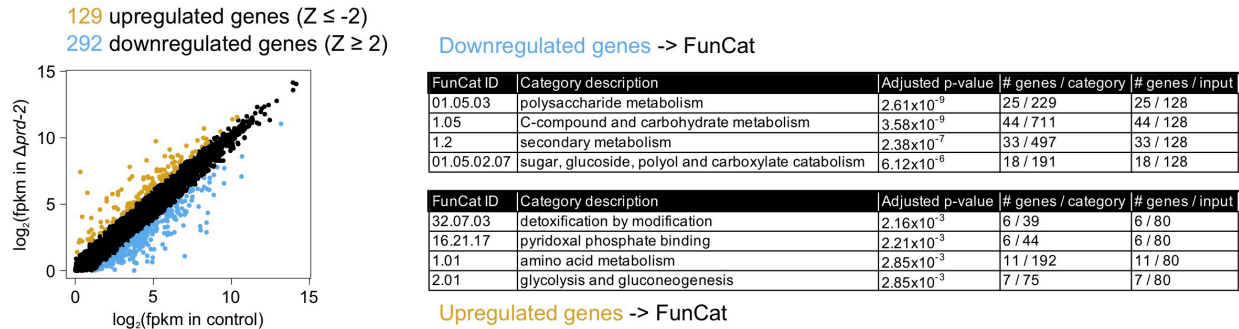

720

721 **Supplementary Figure 4. Hundreds of genes have altered expression levels in the  $\Delta prd-2$**

722 **mutant but a common pathway or sequence motif was not detected.** RNA-Seq data were

723 first filtered for low expression. 8,622 out of 9,730 annotated *N. crassa* genes were expressed in

724 4/6 samples ( $> 0$  FPKM units in triplicate control and  $\Delta prd-2$ ). FPKM units for 8,622 expressed

725 genes were  $\log_2$ -transformed, averaged, subtracted from control, and Z-scores computed. 129

726 genes (gold) were upregulated in  $\Delta prd-2$  ( $Z$ -score  $< -2$ ), and 292 genes (blue) were

727 downregulated in  $\Delta prd-2$  ( $Z$ -score  $> 2$ ). Hypothesizing that PRD-2 is an RNA-binding protein

728 that stabilizes its target transcripts (Figure 3B), we searched for enriched sequence motifs in the

729 untranslated regions of the 292 downregulated genes using Weeder2 (212 annotated 5' UTRs

730 and 226 annotated 3' UTRs searched). Zero motifs scored better than 1.5 from Weeder2 output

731 compared to background *Neurospora* nucleotide frequencies (data not shown). Up- and down-

732 regulated gene categories were then run through FunCat to determine functionally enriched

733 categories of genes in the putative PRD-2 regulon. 128 of the 292 downregulated genes were

734 input to FunCat, and the top scoring functional categories indicated that carbohydrate and

735 secondary metabolism were decreased in  $\Delta prd-2$ . 80 out of the 128 upregulated genes were

736 also input to FunCat, and other metabolism categories were identified, which could indicate

737 altered central carbon metabolism in the  $\Delta prd-2$  mutant, correlating with its slow growth

738 phenotype.

739

740

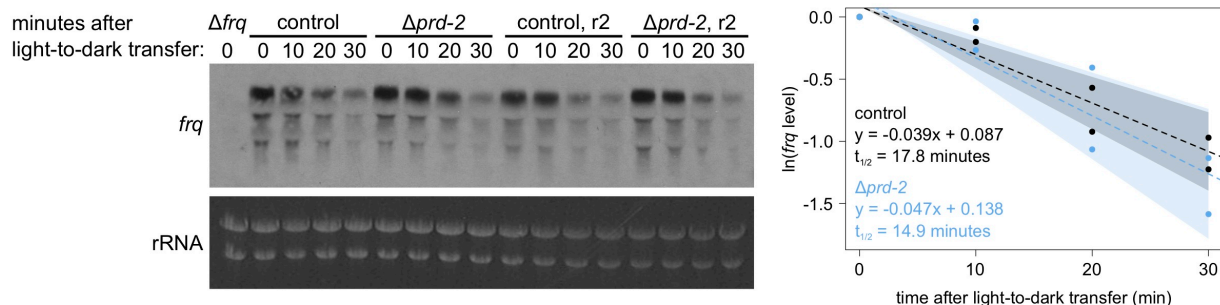

741  
 742 **Supplementary Figure 5. Loss of *prd-2* has little effect on stability of the *frq* transcript.** *frq*  
 743 mRNA degradation kinetics were examined by Northern blot in a time course after light-to-dark  
 744 transfer (N = 2 biological replicates). RNA levels were quantified using ImageJ, natural log  
 745 transformed, fit with a linear model (`glm` in R, Gaussian family defaults), and half-life was  
 746 calculated assuming first order decay kinetics ( $\ln(2) / \text{slope}$ ). Shaded areas around the linear fit  
 747 represent 95% confidence intervals on the slope. The *frq* half-life is approximately 3 minutes  
 748 shorter in  $\Delta prd-2$  but is not statistically different from the control.  
 749  
 750

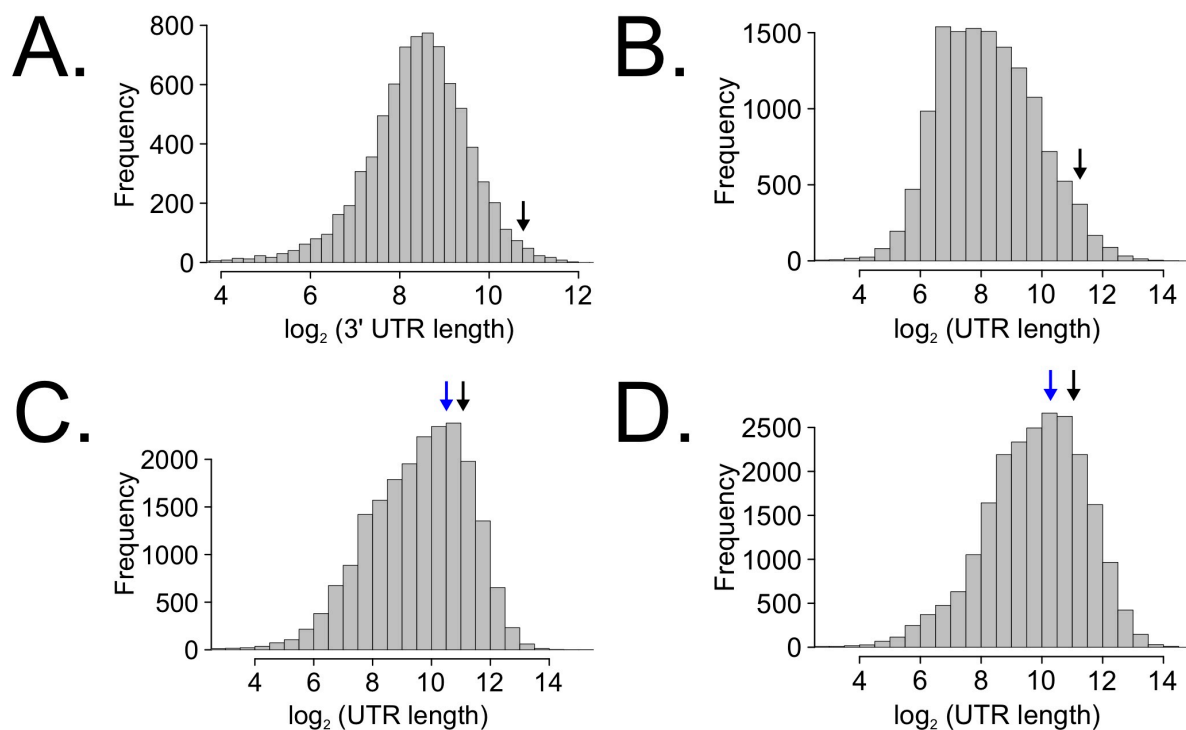

751  
 752 **Supplementary Figure 6. Long untranslated regions (UTRs) are characteristic of *casein***  
 753 ***kinase I* gene orthologs across species.** *Neurospora* 3' UTR lengths were mined from 7,793  
 754 annotated genes (as described in Figure 5C) and plotted as a histogram. The black arrow marks

755 the 3' UTR of *ck-1a* (NCU00685) at 1,739 bp in length (**A**). UTR lengths from *Drosophila*  
 756 *melanogaster* were mined from 13,552 uniquely annotated genes (Ensembl GTF version  
 757 BDGP6, accessed on 8/5/2020 from Illumina iGenomes) and plotted as a histogram. The black  
 758 arrow marks the UTR of *dbt* (FBgn0002413) at 2,443 bp in length (**B**). UTR lengths from *Mus*  
 759 *musculus* were mined from 20,477 uniquely annotated genes (Ensembl GTF version GRCm38,  
 760 accessed on 8/5/2020 from Illumina iGenomes) and plotted as a histogram. The black arrow  
 761 marks the UTR of CSNK1D (ENSMUSG00000025162) at 2,157 bp in length, and the blue arrow  
 762 corresponds to CSNK1E (ENSMUSG00000022433) at 1,456 bp (**C**). UTR lengths from *Homo*  
 763 *sapiens* were mined from 22,401 uniquely annotated genes (Ensembl GTF version GRCh37,  
 764 accessed on 8/5/2020 from Illumina iGenomes) and plotted as a histogram. The black arrow  
 765 marks the UTR of CSNK1D (ENSG00000141551) at 2,113 bp in length, and the blue arrow  
 766 corresponds to CSNK1E (ENSG00000213923) at 1,247 bp (**D**).

767

768

769 **Supplementary Table 1. *Neurospora crassa* strains used in this study.**

| Strain    | Genotype                                                                                                                                                | Source                   |
|-----------|---------------------------------------------------------------------------------------------------------------------------------------------------------|--------------------------|
| FGSC2489  | OR74A <i>mat A</i>                                                                                                                                      | FGSC                     |
| FGSC9718  | $\Delta mus-51::bar^R$ ; <i>mat a</i>                                                                                                                   | FGSC                     |
| FGSC11229 | $\Delta NCU04242::hph^R$ ; <i>mat a</i>                                                                                                                 | FGSC ( <i>prd-6</i> )    |
| FGSC15706 | $\Delta NCU05267::hph^R$ ; $\Delta mus-51::bar^R$ ; <i>mat a</i>                                                                                        | FGSC ( <i>upf2</i> )     |
| FGSC11679 | $\Delta NCU03435::hph^R$ ; <i>mat a</i>                                                                                                                 | FGSC ( <i>upf3</i> )     |
| FGSC12475 | $\Delta NCU03775::hph^R$ ; <i>mat A</i>                                                                                                                 | FGSC                     |
| 87-3      | <i>ras-1<sup>bd</sup></i> ; <i>mat a</i>                                                                                                                | This Laboratory          |
| 328-4     | <i>ras-1<sup>bd</sup></i> ; <i>mat A</i>                                                                                                                | This Laboratory          |
| 613-43    | <i>ras-1<sup>bd</sup></i> ; <i>prd-2</i> ; <i>mat a</i>                                                                                                 | Feldman Laboratory       |
| 613-102   | <i>ras-1<sup>bd</sup></i> ; <i>prd-2</i> ; <i>mat A</i>                                                                                                 | Feldman Laboratory       |
| 1138-1    | [ $bar^R::qa-2p-NCU00685$ ]; $\Delta mus-52::hph^R$ ; <i>ras-1<sup>bd</sup></i> ; <i>mat a</i> [heterokaryon]                                           | PMID: 19450520           |
| 1810      | <i>ras-1<sup>bd</sup></i> ; $\Delta NCU01019::bar^R$ ; <i>mat A</i>                                                                                     | This Study (Fig 1, 3, 4) |
| 834-1     | <i>ras-1<sup>bd</sup></i> ; $hph^R::qa-2p-NCU01019$                                                                                                     | This Study (Fig 1)       |
| 1929      | <i>csr-1::NCU01019-luciferase</i> ; <i>ras-1<sup>bd</sup></i> ; <i>prd-2<sup>INV</sup></i> ; <i>mat A</i>                                               | This Study (Fig 1)       |
| 1930      | <i>csr-1::NCU01019-luciferase</i> ; <i>ras-1<sup>bd</sup></i> ; <i>mat A</i>                                                                            | This Study (Sup Fig 2)   |
| 1786-1    | <i>csr-1::frq<sub>cbxp</sub>-luciferase::bar<sup>R</sup></i> ; <i>ras-1<sup>bd</sup></i> ; <i>mat a</i>                                                 | This Study (Fig 2, 4, 5) |
| 1931      | <i>csr-1::frq<sub>cbxp</sub>-luciferase::bar<sup>R</sup></i> ; <i>ras-1<sup>bd</sup></i> ; $\Delta NCU01019::bar^R$ ; <i>mat A</i>                      | This Study (Fig 2, 4, 5) |
| 1932      | <i>csr-1::frq<sub>cbxp</sub>-luciferase::bar<sup>R</sup></i> ; <i>ras-1<sup>bd</sup></i> ; V5-NCU01019 $\Delta$ SUZ[ $\Delta$ aa345-431]; $hph^R$       | This Study (Fig 2)       |
| 1933      | <i>csr-1::frq<sub>cbxp</sub>-luciferase::bar<sup>R</sup></i> ; <i>ras-1<sup>bd</sup></i> ; V5-NCU01019 $\Delta$ Cterminus[ $\Delta$ aa440-790]; $hph^R$ | This Study (Fig 2)       |
| 1934      | <i>csr-1::frq<sub>cbxp</sub>-luciferase::bar<sup>R</sup></i> ; $\Delta mus-51::bar^R$ ; NCU01019 $\Delta$ R3H[ $\Delta$ aa264-344]; $hph^R$             | This Study (Fig 2)       |

|               |                                                                                                                                                   |                       |
|---------------|---------------------------------------------------------------------------------------------------------------------------------------------------|-----------------------|
| CX002_B4-11-1 | <i>csr-1::NCU01019ΔSUZ[Δaa345-432]-V5::bar<sup>R</sup>; ras-1<sup>bd</sup>; ΔNCU01019::hph<sup>R</sup></i>                                        | This Study (Fig 2)    |
| CX002_B4-11-6 | <i>csr-1::NCU01019ΔR3H[Δaa281-344]-V5::bar<sup>R</sup>; ras-1<sup>bd</sup>; ΔNCU01019::hph<sup>R</sup></i>                                        | This Study (Fig 2)    |
| CX002_B4-11-5 | <i>csr-1::NCU01019ΔCterminus[Δaa495-790]-V5::bar<sup>R</sup>; ras-1<sup>bd</sup>; ΔNCU01019::hph<sup>R</sup></i>                                  | This Study (Fig 2)    |
| CX002_B4-11-3 | <i>csr-1::NCU01019ΔCterminus[Δaa525-612]-V5::bar<sup>R</sup>; ras-1<sup>bd</sup>; ΔNCU01019::hph<sup>R</sup></i>                                  | This Study (Fig 2)    |
| CX002_B4-11-8 | <i>csr-1::NCU01019ΔCterminus[Δaa625-682]-V5::bar<sup>R</sup>; ras-1<sup>bd</sup>; ΔNCU01019::hph<sup>R</sup></i>                                  | This Study (Fig 2)    |
| 1813          | <i>ras-1<sup>bd</sup>; NCU01019-10xGly_V5_10xHis_3xFLAG::hph<sup>R</sup>; mat a</i>                                                               | This Study (Fig 2, 3) |
| 1888          | <i>ras-1<sup>bd</sup>; NCU16560-10xGly_V5_10xHis_3xFLAG::hph<sup>R</sup></i>                                                                      | This Study (Fig 3)    |
| 1935          | <i>bar<sup>R</sup>::qa-2p-NCU00685; ras-1<sup>bd</sup></i>                                                                                        | This Study (Fig 4, 5) |
| 1936          | <i>bar<sup>R</sup>::qa-2p-NCU00685; ras-1<sup>bd</sup>; ΔNCU01019::bar<sup>R</sup></i>                                                            | This Study (Fig 4)    |
| 721-3         | <i>NCU00685-SHORT-HA3::hph<sup>R</sup>; ras-1<sup>bd</sup>; mat a</i>                                                                             | This Study            |
| 1937          | <i>csr-1::frq<sup>cbxp</sup>-luciferase::bar<sup>R</sup>; NCU00685-SHORT-HA3::hph<sup>R</sup>; ras-1<sup>bd</sup>; mat a</i>                      | This Study (Fig 4)    |
| 1938          | <i>csr-1::frq<sup>cbxp</sup>-luciferase::bar<sup>R</sup>; NCU00685-SHORT-HA3::hph<sup>R</sup>; ras-1<sup>bd</sup>; ΔNCU01019::bar<sup>R</sup></i> | This Study (Fig 4)    |
| 1939          | <i>csr-1::frq<sup>cbxp</sup>-luciferase::bar<sup>R</sup>; ras-1<sup>bd</sup>; ΔNCU04242::hph<sup>R</sup>; mat A</i>                               | This Study (Fig 5)    |
| 1940          | <i>csr-1::frq<sup>cbxp</sup>-luciferase::bar<sup>R</sup>; ras-1<sup>bd</sup>; ΔNCU01019::bar<sup>R</sup>; ΔNCU04242::hph<sup>R</sup></i>          | This Study (Fig 5)    |
| 1941          | <i>csr-1::frq<sup>cbxp</sup>-luciferase::bar<sup>R</sup>; ras-1<sup>bd</sup>; ΔNCU05267::hph<sup>R</sup></i>                                      | This Study (Fig 5)    |
| 1942          | <i>csr-1::frq<sup>cbxp</sup>-luciferase::bar<sup>R</sup>; ras-1<sup>bd</sup>; ΔNCU05267::hph<sup>R</sup>; ΔNCU01019::bar<sup>R</sup></i>          | This Study (Fig 5)    |
| 1943          | <i>csr-1::frq<sup>cbxp</sup>-luciferase::bar<sup>R</sup>; ΔNCU03435::hph<sup>R</sup>; ras-1<sup>bd</sup></i>                                      | This Study (Fig 5)    |
| 1944          | <i>csr-1::frq<sup>cbxp</sup>-luciferase::bar<sup>R</sup>; ΔNCU03435::hph<sup>R</sup>; ras-1<sup>bd</sup>; ΔNCU01019::bar<sup>R</sup></i>          | This Study (Fig 5)    |
| 1945          | <i>bar<sup>R</sup>::qa-2p-NCU00685; ras-1<sup>bd</sup>; ΔNCU04242::hph<sup>R</sup></i>                                                            | This Study (Fig 5)    |

770

## 771 Acknowledgements

772 We thank the Fungal Genetics Stock Center (Kansas City, Missouri, USA) for curating *N.*  
773 *crassa* strains. We thank Arun Mehra for discussions on preliminary work to identify the clock-  
774 relevant mechanism of the *prd-6* mutation, Bin Wang for assistance in constructing and  
775 validating the CKI<sup>SHORT</sup> hyperactive allele, Jill Emerson for assistance in constructing *Δprd-2*  
776 (NCU01019), and Brad Bartholomai for discussions on *prd-2*. The *Neurospora* CK1a antibody  
777 was courtesy of Michael Brunner (University of Heidelberg).

778

## 779 Competing Interests

780 The authors declare that no competing interests exist.

781

## 782 References

- 783 Aronson BD, Johnson KA, Loros JJ, Dunlap JC. 1994. Negative feedback defining a circadian  
784 clock: autoregulation of the clock gene *frequency*. *Science*, 263(5153), 1578–84.  
785 doi:10.1126/science.8128244  
786 Aryal RP, Kwak PB, Tamayo AG, Gebert M, Chiu PL, Walz T, Weitz CJ. 2017. Macromolecular

- 787 Assemblies of the Mammalian Circadian Clock. *Molecular Cell*, 67(5), 770-782.e6.  
788 doi:10.1016/j.molcel.2017.07.017
- 789 Baker CL, Kettenbach AN, Loros JJ, Gerber SA, Dunlap JC. 2009. Quantitative Proteomics  
790 Reveals a Dynamic Interactome and Phase-Specific Phosphorylation in the *Neurospora*  
791 Circadian Clock. *Molecular Cell*, 34(3), 354–363. doi:10.1016/j.molcel.2009.04.023
- 792 Bardiya N, Shiu PKT. 2007. Cyclosporin A-resistance based gene placement system for  
793 *Neurospora crassa*. *Fungal Genetics and Biology*, 44(5), 307–314.  
794 doi:10.1016/j.fgb.2006.12.011
- 795 Belden WJ, Larrondo LF, Froehlich AC, Shi M, Chen CH, Loros JJ, Dunlap JC. 2007. The *band*  
796 mutation in *Neurospora crassa* is a dominant allele of *ras-1* implicating RAS signaling in  
797 circadian output. *Genes & Development*, 21(12), 1494–1505. doi:10.1101/gad.1551707
- 798 Chen CH, Ringelberg CS, Gross RH, Dunlap JC, Loros JJ. 2009. Genome-wide analysis of  
799 light-inducible responses reveals hierarchical light signalling in *Neurospora*. *The EMBO*  
800 *Journal*, 28(8), 1029–1042. doi:10.1038/emboj.2009.54
- 801 Cheong JK, Virshup DM. 2011. Casein kinase 1: Complexity in the family. *International Journal*  
802 *of Biochemistry and Cell Biology*, 43(4), 465–469. doi:10.1016/j.biocel.2010.12.004
- 803 Colot HV, Loros JJ, Dunlap JC. 2005. Temperature-modulated alternative splicing and promoter  
804 use in the circadian clock gene *frequency*. *Molecular Biology of the Cell*, 16(12), 5563–71.  
805 doi:10.1091/mbc.E05-08-0756
- 806 Compton J. 2003. Advances in understanding the molecular biology of *Neurospora crassa*.  
807 Ph.D. Thesis, University of California Santa Cruz.
- 808 Diernfellner ACR, Schafmeier T, Merrow MW, Brunner M. 2005. Molecular mechanism of  
809 temperature sensing by the circadian clock of *Neurospora crassa*. *Genes & Development*,  
810 19(17), 1968–1973. doi:10.1101/gad.345905.clock
- 811 Dobin A, Davis CA, Schlesinger F, Drenkow J, Zaleski C, Jha S, Batut P, Chaisson M, Gingeras  
812 TR. 2013. STAR: Ultrafast universal RNA-seq aligner. *Bioinformatics*, 29(1), 15–21.  
813 doi:10.1093/bioinformatics/bts635
- 814 Dunlap JC, Loros JJ. 2018. Just-So Stories and Origin Myths: Phosphorylation and Structural  
815 Disorder in Circadian Clock Proteins. *Molecular Cell*, 69(2), 165–168.  
816 doi:10.1016/j.molcel.2017.11.028
- 817 Emerson JM, Bartholomai BM, Ringelberg CS, Baker SE, Loros JJ, Dunlap JC. 2015. *period-1*  
818 encodes an ATP-dependent RNA helicase that influences nutritional compensation of the  
819 *Neurospora* circadian clock. *Proceedings of the National Academy of Sciences of the*  
820 *United States of America*, 112(51), 15707–15712. doi:10.1073/pnas.1521918112



- 821 Feldman JF, Hoyle MN. 1973. Isolation of circadian clock mutants of *Neurospora crassa*.  
822 *Genetics*, 75(4), 605–613.
- 823 Feldman JF, Hoyle MN. 1976. Complementation analysis of linked circadian clock mutants of  
824 *Neurospora crassa*. *Genetics*, 82(1), 9–17.
- 825 Fustin JM, Kojima R, Itoh K, Chang HY, Ye S, Zhuang B, Oji A, Gibo S, Narasimamurthy R,  
826 Virshup D, Kurosawa G, Doi M, Manabe I, Ishihama Y, Ikawa M, Okamura H. 2018. Two  
827 *Ck1δ* transcripts regulated by m6A methylation code for two antagonistic kinases in the  
828 control of the circadian clock. *Proceedings of the National Academy of Sciences of the*  
829 *United States of America*, 115(23), 5980–5985. doi:10.1073/pnas.1721371115
- 830 Garceau NY, Liu Y, Loros JJ, Dunlap JC. 1997. Alternative initiation of translation and time-  
831 specific phosphorylation yield multiple forms of the essential clock protein FREQUENCY.  
832 *Cell*, 89(3), 469–476. doi:10.1016/S0092-8674(00)80227-5
- 833 Gardner GF, Feldman JF. 1981. Temperature Compensation of Circadian Period Length in  
834 Clock Mutants of *Neurospora crassa*. *Plant Physiology*, 68(6), 1244–8. doi:  
835 10.1104/pp.68.6.1244
- 836 Ge Z, Quek BL, Beemon KL, Hogg JR. 2016. Polypyrimidine tract binding protein 1 protects  
837 mRNAs from recognition by the nonsense-mediated mRNA decay pathway. *eLife*, 5, 1–25.  
838 doi:10.7554/elife.11155
- 839 Gooch VD, Mehra A, Larrondo LF, Fox J, Touroutoutoudis M, Loros JJ, Dunlap JC. 2008. Fully  
840 codon-optimized *luciferase* uncovers novel temperature characteristics of the *Neurospora*  
841 clock. *Eukaryotic Cell*, 7(1), 28–37. doi:10.1128/EC.00257-07
- 842 Gorl M, Merrow M, Huttner B, Johnson J, Roenneberg T, Brunner M. 2001. A PEST-like  
843 element in FREQUENCY determines the length of the circadian period in *Neurospora*  
844 *crassa*. *EMBO Journal*, 20(24), 7074–7084. doi:10.1093/emboj/20.24.7074
- 845 Guo G, Wang K, Hu SS, Tian T, Liu P, Mori T, Chen P, Johnson CH, Qin X. 2019. Autokinase  
846 Activity of Casein Kinase 1  $\delta/\epsilon$  Governs the Period of Mammalian Circadian Rhythms.  
847 *Journal of Biological Rhythms*, 34(5), 482–496. doi:10.1177/0748730419865406
- 848 Guo J, Cheng P, Yuan H, Liu Y. 2009. The Exosome Regulates Circadian Gene Expression in a  
849 Posttranscriptional Negative Feedback Loop. *Cell*, 138(6), 1236–1246.  
850 doi:10.1016/j.cell.2009.06.043
- 851 He Q, Cha J, He Q, Lee HC, Yang Y, Liu Y. 2006. CKI and CKII mediate the FREQUENCY-  
852 dependent phosphorylation of the WHITE COLLAR complex to close the *Neurospora*  
853 circadian negative feedback loop. *Genes & Development*, 20(18), 2552–2565.  
854 doi:10.1101/gad.1463506

- 855 Heintzen C, Loros JJ, Dunlap JC. 2001. The PAS protein VIVID defines a clock-associated  
856 feedback loop that represses light input, modulates gating, and regulates clock resetting.  
857 Cell, 104(3), 453–464. doi:10.1016/S0092-8674(01)00232-X
- 858 Hong CI, Ruoff P, Loros JJ, Dunlap JC. 2008. Closing the circadian negative feedback loop:  
859 FRQ-dependent clearance of WC-1 from the nucleus. Genes & Development, 22(22),  
860 3196–3204. doi:10.1101/gad.1706908
- 861 Hurley JM, Dasgupta A, Emerson JM, Zhou X, Ringelberg CS, Knabe N, Lipzen AM, Lindquist  
862 EA, Daum CG, Barry KW, Grigoriev IV, Smith KM, Galagan JE, Bell-Pedersen D, Freitag  
863 M, Cheng C, Loros JJ, Dunlap JC. 2014. Analysis of clock-regulated genes in *Neurospora*  
864 reveals widespread posttranscriptional control of metabolic potential. Proceedings of the  
865 National Academy of Sciences of the United States of America, 111(48), 16995–17002.  
866 doi:10.1073/pnas.1418963111
- 867 Hurley JM, Jankowski MS, De Los Santos H, Crowell AM, Fordyce SB, Zucker JD, Kumar N,  
868 Purvine SO, Robinson EW, Shukla A, Zink E, Cannon WR, Baker SE, Loros JJ, Dunlap JC.  
869 2018. Circadian Proteomic Analysis Uncovers Mechanisms of Post-Transcriptional  
870 Regulation in Metabolic Pathways. Cell Systems, 7(6), 613-626.e5.  
871 doi:10.1016/j.cels.2018.10.014
- 872 Hurley JM, Larrondo LF, Loros JJ, Dunlap JC. 2013. Conserved RNA helicase FRH acts  
873 nonenzymatically to support the intrinsically disordered *Neurospora* clock protein FRQ.  
874 Molecular Cell, 52(6), 832–843. doi:10.1016/j.molcel.2013.11.005
- 875 Hurley JM, Loros JJ, Dunlap JC. 2016. Circadian Oscillators: Around the Transcription-  
876 Translation Feedback Loop and on to Output. Trends in Biochemical Sciences, 41(10),  
877 834–846. doi:10.1016/j.tibs.2016.07.009
- 878 Isojima Y, Nakajima M, Ukai H, Fujishima H, Yamada RG, Masumoto KH, Kiuchi R, Ishida M,  
879 Ukai-Tadenuma M, Minami Y, Kito R, Nakao K, Kishimoto W, Yoo SH, Shimomura K,  
880 Takao T, Takano A, Kojima T, Nagai K, Sakaki Y, Takahashi JS, Ueda HR. 2009.  
881 CKepsilon/delta-dependent phosphorylation is a temperature-insensitive, period-  
882 determining process in the mammalian circadian clock. Proceedings of the National  
883 Academy of Sciences of the United States of America, 106(37), 15744–9.  
884 doi:10.1073/pnas.0908733106
- 885 James AB, Syed NH, Bordage S, Marshall J, Nimmo GA, Jenkins GI, Herzyk P, Brown JW,  
886 Nimmo HG. 2012. Alternative splicing mediates responses of the *Arabidopsis* circadian  
887 clock to temperature changes. Plant Cell, 24(3), 961–981. doi:10.1105/tpc.111.093948
- 888 Kelliher CM, Loros JJ, Dunlap JC. 2020. Evaluating the circadian rhythm and response to

- 889 glucose addition in dispersed growth cultures of *Neurospora crassa*. *Fungal Biology*,  
890 124(5), 398–406. doi:10.1016/j.funbio.2019.11.004
- 891 Kloss B, Rothenfluh A, Young MW, Saez L. 2001. Phosphorylation of PERIOD is influenced by  
892 cycling physical associations of DOUBLE-TIME, PERIOD, and TIMELESS in the  
893 *Drosophila* clock. *Neuron*, 30(3), 699–706. doi:10.1016/S0896-6273(01)00320-8
- 894 Koike N, Yoo SH, Huang HC, Kumar V, Lee C, Kim TK, Takahashi JS. 2012. Transcriptional  
895 architecture and chromatin landscape of the core circadian clock in mammals. *Science*,  
896 338(6105), 349–54. doi:10.1126/science.1226339
- 897 Konopka RJ, Benzer S. 1971. Clock mutants of *Drosophila melanogaster*. *Proceedings of the*  
898 *National Academy of Sciences of the United States of America*, 68(9), 2112–6.  
899 doi:10.1073/pnas.68.9.2112
- 900 Kramer C, Loros JJ, Dunlap JC, Crosthwaite SK. 2003. Role for antisense RNA in regulating  
901 circadian clock function in *Neurospora crassa*. *Nature Biotechnology*, 21(12), 948–952.  
902 doi:10.1038/nature01427
- 903 Lambreghts R. 2012. Exploring New Players in the *Neurospora* Core Clock and its Output.  
904 Ph.D. Thesis, Dartmouth College, 1–335.
- 905 Larrondo LF, Olivares-Yañez C, Baker CL, Loros JJ, Dunlap JC. 2015. Decoupling circadian  
906 clock protein turnover from circadian period determination. *Science*, 347(6221), 1257277-  
907 1–8. doi:10.1126/science.1257277
- 908 Lauinger L, Li J, Shostak A, Cemel IA, Ha N, Zhang Y, Merkl PE, Obermeyer S, Stankovic-  
909 Valentin N, Schafmeier T, Wever WJ, Bowers AA, Carter KP, Palmer AE, Tschochner H,  
910 Melchior F, Deshaies RJ, Brunner M, Diernfellner A. 2017. Thiolutin is a zinc chelator that  
911 inhibits the Rpn11 and other JAMM metalloproteases. *Nature Chemical Biology*, 13(7),  
912 709–714. doi:10.1038/nchembio.2370
- 913 Lee H, Chen R, Lee Y, Yoo S, Lee C. 2009. Essential roles of CKI $\delta$  and CKI $\epsilon$  in the mammalian  
914 circadian clock. *Proceedings of the National Academy of Sciences*, 106(50), 21359–21364.  
915 doi:10.1073/pnas.0906651106
- 916 Lewis M. 1995. Molecular genetic analysis of circadian clock genes in *Neurospora crassa*. Ph.D.  
917 Thesis, University of California Santa Cruz.
- 918 Liu X, Chen A, Caicedo-Casso A, Cui G, Du M, He Q, Lim S, Kim HJ, Hong CI, Liu Y. 2019.  
919 FRQ-CK1 interaction determines the period of circadian rhythms in *Neurospora*. *Nature*  
920 *Communications*, 10(1), 1–13. doi:10.1038/s41467-019-12239-w
- 921 Liu Y, Garceau NY, Loros JJ, Dunlap JC. 1997. Thermally regulated translational control of FRQ  
922 mediates aspects of temperature responses in the *Neurospora* circadian clock. *Cell*, 89(3),

- 923 477–486. doi:10.1016/S0092-8674(00)80228-7
- 924 Loros JJ. 2020. Principles of the animal molecular clock learned from *Neurospora*. European  
925 Journal of Neuroscience, 51(1), 19–33. doi: 10.1111/ejn.14354
- 926 Majercak J, Sidote D, Hardin PE, Edery I. 1999. How a circadian clock adapts to seasonal  
927 decreases in temperature and day length. Neuron, 24(1), 219–230. doi:10.1016/S0896-  
928 6273(00)80834-X
- 929 Mateos JL, de Leone MJ, Torchio J, Reichel M, Staiger D. 2018. Beyond transcription: Fine-  
930 tuning of circadian timekeeping by post-transcriptional regulation. Genes, 9(12).  
931 doi:10.3390/genes9120616
- 932 Mehra A, Shi M, Baker CL, Colot HV, Loros JJ, Dunlap JC. 2009. A Role for Casein Kinase 2 in  
933 the Mechanism Underlying Circadian Temperature Compensation. Cell, 137(4), 749–760.  
934 doi:10.1016/j.cell.2009.03.019
- 935 Metzzenberg RL. 2004. Bird Medium: an alternative to Vogel Medium. Fungal Genetics Reports,  
936 51, 19–20. doi:10.4148/1941-4765.1138
- 937 Millius A, Ueda HR. 2017. Systems biology-derived discoveries of intrinsic clocks. Frontiers in  
938 Neurology, 8, 1–19. doi:10.3389/fneur.2017.00025
- 939 Morgan LW, Feldman JF. 1997. Isolation and characterization of a temperature-sensitive  
940 circadian clock mutant of *Neurospora crassa*. Genetics, 146(2), 525–30.
- 941 Morgan LW, Feldman JF. 2001. Epistatic and synergistic interactions between circadian clock  
942 mutations in *Neurospora crassa*. Genetics, 159(2), 537–543.
- 943 Nakashima H. 1981. A liquid culture method for the biochemical analysis of the circadian clock  
944 of *Neurospora crassa*. Plant & Cell Physiology, 22(2), 231–238.
- 945 Narasimamurthy R, Hunt SR, Lu Y, Fustin JM, Okamura H, Partch CL, Forger DB, Kim JK,  
946 Virshup DM. 2018. CK1 $\delta$ /e protein kinase primes the PER2 circadian phosphoswitch.  
947 Proceedings of the National Academy of Sciences of the United States of America,  
948 115(23), 5986–5991. doi:10.1073/pnas.1721076115
- 949 Ode KL, Ukai H, Susaki EA, Narumi R, Matsumoto K, Hara J, Koide N, Abe T, Kanemaki MT,  
950 Kiyonari H, Ueda HR. 2017. Knockout-Rescue Embryonic Stem Cell-Derived Mouse  
951 Reveals Circadian-Period Control by Quality and Quantity of CRY1. Molecular Cell, 65(1),  
952 176–190. doi:10.1016/j.molcel.2016.11.022
- 953 Partch CL. 2020. Orchestration of Circadian Timing by Macromolecular Protein Assemblies.  
954 Journal of Molecular Biology, 432(12), 3426–3448. doi:10.1016/j.jmb.2019.12.046
- 955 Pelham JF, Dunlap JC, Hurley JM. 2020. Intrinsic disorder is an essential characteristic of  
956 components in the conserved circadian circuit. Cell Communication and Signaling, In

- 957 Press.
- 958 Pelham JF, Mosier AE, Hurley JM. 2018. Characterizing Time-of-Day Conformational Changes  
959 in the Intrinsically Disordered Proteins of the Circadian Clock. *Methods in Enzymology*,  
960 611, 503–529. doi:10.1016/bs.mie.2018.08.024
- 961 Philpott JM, Narasimamurthy R, Ricci CG, Freeberg AM, Hunt SR, Yee LE, Pelofsky RS,  
962 Tripathi S, Virshup DM, Partch CL. 2020. Casein kinase 1 dynamics underlie substrate  
963 selectivity and the PER2 circadian phosphoswitch. *eLife*, 9, 1–28. doi:10.7554/eLife.52343
- 964 Pogue AM, Liu Q, Baker CL, Dunlap JC, Loros JJ. 2006. The *Neurospora* checkpoint kinase  
965 2: a regulatory link between the circadian and cell cycles. *Science*, 313(5787), 644–9.  
966 doi:10.1126/science.1121716
- 967 Querfurth C, Diernfellner A, Heise F, Lauinger L, Neiss A, Tataroglu Ö, Brunner M, Schafmeier  
968 T. 2007. Posttranslational regulation of *Neurospora* circadian clock by CK1a-dependent  
969 phosphorylation. *Cold Spring Harbor Symposia on Quantitative Biology*, 72, 177–183.  
970 doi:10.1101/sqb.2007.72.025
- 971 Ralph MR, Menaker M. 1988. A mutation of the circadian system in golden hamsters. *Science*,  
972 241(4870), 1225–1227. doi:10.1126/science.3413487
- 973 Ri H, Lee J, Sonn JY, Yoo E, Lim C, Choe J. 2019. *Drosophila CrebB* is a Substrate of the  
974 Nonsense-Mediated mRNA Decay Pathway that Sustains Circadian Behaviors. *Molecules*  
975 and Cells, 42(4), 301–312. doi:10.14348/molcells.2019.2451
- 976 Roenneberg T, Taylor W. 2000. Automated recordings of bioluminescence with special  
977 reference to the analysis of circadian rhythms. *Methods in Enzymology*, 305, 104–119. doi:  
978 10.1016/s0076-6879(00)05481-1
- 979 Sargent ML, Briggs WR, Woodward DO. 1966. Circadian nature of a rhythm expressed by an  
980 invertaseless strain of *Neurospora crassa*. *Plant Physiology*, 41(8), 1343–9.  
981 doi:10.1104/pp.41.8.1343
- 982 Song MH, Aravind L, Müller-Reichert T, O’Connell KF. 2008. The conserved protein SZY-20  
983 opposes the Plk4-related kinase ZYG-1 to limit centrosome size. *Developmental Cell*,  
984 15(6), 901–12. doi:10.1016/j.devcel.2008.09.018
- 985 Sundaram S, Nagaraj S, Mahoney H, Portugues A, Li W, Millsaps K, Faulkner J, Yunus A,  
986 Burns C, Bloom C, Said M, Pinto L, Azam S, Flores M, Henriksen A, Gamsby J, Gulick D.  
987 2019. Inhibition of casein kinase 1 $\delta/\epsilon$  improves cognitive-affective behavior and reduces  
988 amyloid load in the APP-PS1 mouse model of Alzheimer’s disease. *Scientific Reports*, 9(1),  
989 1–13. doi:10.1038/s41598-019-50197-x
- 990 Tan Y, Dragovic Z, Roenneberg T, Mrosovsky M. 2004. Entrainment dissociates transcription and

- 991 translation of a circadian clock gene in *Neurospora*. *Current Biology*, 14(5), 433–438.  
992 doi:10.1016/j.cub.2004.02.035
- 993 Toh KL, Jones CR, He Y, Eide EJ, Hinz WA, Virshup DM, Ptáček LJ, Fu YH. 2001. An hPer2  
994 phosphorylation site mutation in familial advanced sleep phase syndrome. *Science*,  
995 291(5506), 1040–1043. doi:10.1126/science.1057499
- 996 Top D, O'Neil JL, Merz GE, Dusad K, Crane BR, Young MW. 2018. CK1/doubletime activity  
997 delays transcription activation in the circadian clock. *eLife*, 7, 1–21.  
998 doi:10.7554/eLife.32679
- 999 Trapnell C, Hendrickson DG, Sauvageau M, Goff L, Rinn JL, Pachter L. 2013. Differential  
1000 analysis of gene regulation at transcript resolution with RNA-seq. *Nature Biotechnology*,  
1001 31(1), 46–53. doi:10.1038/nbt.2450
- 1002 Tsuchiya Y, Umemura Y, Minami Y, Koike N, Hosokawa T, Hara M, et al. 2016. Effect of  
1003 Multiple Clock Gene Ablations on the Circadian Period Length and Temperature  
1004 Compensation in Mammalian Cells. *Journal of Biological Rhythms*, 31(1), 48–56.  
1005 doi:10.1177/0748730415613888
- 1006 Vanselow K, Vanselow JT, Westermarck PO, Reischl S, Maier B, Korte T, et al. 2006. Differential  
1007 effects of PER2 phosphorylation: Molecular basis for the human familial advanced sleep  
1008 phase syndrome (FASPS). *Genes and Development*, 20(19), 2660–2672.  
1009 doi:10.1101/gad.397006
- 1010 Vielhaber E, Virshup DM. 2001. Casein kinase I: From obscurity to center stage. *IUBMB Life*,  
1011 51(2), 73–78. doi:10.1080/15216540152122049
- 1012 Wang B, Kettenbach AN, Zhou X, Loros JJ, Dunlap JC. 2019. The Phospho-Code Determining  
1013 Circadian Feedback Loop Closure and Output in *Neurospora*. *Molecular Cell*, 74(4), 771–  
1014 784. doi:10.1016/j.molcel.2019.03.003
- 1015 Weischenfeldt J, Waage J, Tian G, Zhao J, Damgaard I, Jakobsen JS, Kristiansen K, Krogh A,  
1016 Wang J, Porse BT. 2012. Mammalian tissues defective in nonsense-mediated mRNA  
1017 decay display highly aberrant splicing patterns. *Genome Biology*, 13(5). doi:10.1186/gb-  
1018 2012-13-5-r35
- 1019 Wilinski D, Buter N, Klocko AD, Lapointe CP, Selker EU, Gasch AP, Wickens M. 2017.  
1020 Recurrent rewiring and emergence of RNA regulatory networks. *Proceedings of the*  
1021 *National Academy of Sciences of the United States of America*, 114(14), E2816–E2825.  
1022 doi:10.1073/pnas.1617777114
- 1023 Wu C, Yang F, Smith KM, Peterson M, Dekhang R, Zhang Y, Zucker J, Bredeweg EL, Mallappa  
1024 C, Zhou X, Lyubetskaya A, Townsend JP, Galagan JE, Freitag M, Dunlap JC, Bell-

- 1025 Pedersen D, Sachs MS. 2014. Genome-Wide Characterization of Light-Regulated Genes  
1026 in *Neurospora crassa*. *G3: Genes|Genomes|Genetics*, 4(9), 1731–1745.  
1027 doi:10.1534/g3.114.012617
- 1028 Wu Y, Zhang Y, Sun Y, Yu J, Wang P, Chen S, Ma L, Zhang D, He Q, Guo J. 2017. Up-  
1029 Frameshift Protein UPF1 Regulates *Neurospora crassa* Circadian and Diurnal Growth  
1030 Rhythms. *Genetics*, 206(4), 1881–1893. doi: 10.1534/genetics.117.202788
- 1031 Xu Y, Padiath QS, Shapiro RE, Jones CR, Wu SC, Saigoh N, Saigoh K, Ptáček LJ, Fu YH.  
1032 2005. Functional consequences of a CK1 $\delta$  mutation causing familial advanced sleep phase  
1033 syndrome. *Nature*, 434(7033), 640–644. doi:10.1038/nature03453
- 1034 Yoo SH, Kojima S, Shimomura K, Koike N, Buhr ED, Furukawa T, Ko CH, Gloston G, Ayoub C,  
1035 Nohara K, Reyes BA, Tsuchiya Y, Yoo OJ, Yagita K, Lee C, Chen Z, Yamazaki S, Green  
1036 CB, Takahashi JS. 2017. Period2 3'-UTR and microRNA-24 regulate circadian rhythms by  
1037 repressing PERIOD2 protein accumulation. *Proceedings of the National Academy of*  
1038 *Sciences*, 114(42). doi:10.1073/pnas.1706611114
- 1039 Zhang Y, Sachs MS. 2015. Control of mRNA stability in fungi by NMD, EJC and CBC factors  
1040 through 3'UTR introns. *Genetics*, 200(4), 1133–48. doi:10.1534/genetics.115.176743
- 1041 Zhou M, Guo J, Cha J, Chae M, Chen S, Barral JM, Sachs MS, Liu Y. 2013. Non-optimal codon  
1042 usage affects expression, structure and function of clock protein FRQ. *Nature*, 495(7439),  
1043 111–115. doi:10.1038/nature11833
- 1044 Zhou M, Kim JK, Eng GWL, Forger DB, Virshup DM. 2015. A Period2 Phosphoswitch Regulates  
1045 and Temperature Compensates Circadian Period. *Molecular Cell*, 60(1), 77–88.  
1046 doi:10.1016/j.molcel.2015.08.022  
1047
